# Supplementary material for: LAP2alpha maintains a mobile and low assembly state of A-type lamins in the nuclear interior
Source: eLife. 2021 Feb 19;10:e63476. doi: 10.7554/eLife.63476 (PMC7939549; doi:10.7554/eLife.63476)
Supplement: Figure 2—source data 1. [file elife-63476-fig2-data1.xlsx]

## Sheet: Sheet1
Nucleoplasmic (N) to peripheral (P) signal intensity of mEos3.2-lamin A/C was calculated for single cells and plotted versus DAPI fluorescence intensity
mEos3.2-Lmna WT		mEos3.2-Lmna WT sg1 control		mEos3.2-Lmna LAP2alpha KO sg1		mEos3.2-Lmna WT sg3 control		mEos3.2-Lmna LAP2alpha KO sg3
DAPI	mEos3.2-lamin A/C N/P ratio	DAPI	mEos3.2-lamin A/C N/P ratio	DAPI	mEos3.2-lamin A/C N/P ratio	DAPI	mEos3.2-lamin A/C N/P ratio	DAPI	mEos3.2-lamin A/C N/P ratio
596058928	0.286994	1381935388	0.268029	810939446	0.257041	967344281	0.342779	687336653	0.232986
479707142	0.218253	1834151181	0.187364	675572952	0.310633	733341541	0.259827	1113792090	0.194992
733231194	0.250307	1553976880	0.136187	1370595629	0.33637	996624263	0.271203	926917054	0.118495
554051155	0.160435	1344449855	0.225946	1051378533	0.245761	1290277267	0.24643	1404705657	0.205705
1114644112	0.217786	497972480	0.315508	690905530	0.418317	312220490	0.408387	843967116	0.333837
654700481	0.231013	708187684	0.20045	1311457771	0.230756	453196716	0.251743	651318938	0.327755
555577219	0.257179	378963579	0.305774	1356093027	0.255349	1185526081	0.189558	993903047	0.178448
597471503	0.221315	1309133887	0.135962	990470096	0.340794	766480518	0.138786	719647476	0.519965
691572364	0.173002	892098834	0.0874618	906708453	0.206205	989736653	0.169747	932427638	0.311119
446653921	0.303392	823699861	0.210508	849349236	0.256943	1528390437	0.157087	794165620	0.253159
608445644	0.147074	733516927	0.364895	831136877	0.227673	1296832437	0.190286	1469360116	0.208895
547105368	0.168284	1394906373	0.754977	1235003628	0.199527	930097468	0.183336	616644414	0.513164
1075470469	0.188883	765167016	0.181936	1065010056	0.204374	812521253	0.183471	777689647	0.435575
550280468	0.274927	853584624	0.213005	1160123976	0.15862	625443447	0.291114	571248916	0.271973
1146012614	0.361835	1639517584	0.223714	832171742	0.318638	860205935	0.187462	1415660452	0.272295
1207557919	0.170203	791164513	0.213004	790566769	0.309726	774490265	0.325301	657335731	0.735614
619998078	0.104047	1329924333	0.110839	1376461632	0.273858	1300074126	0.529988	1350401111	0.232536
547968128	0.171646	737362182	0.341155	1093290103	0.353007	482176058	0.302341	1263143714	0.359604
482617913	0.293666	645163746	0.4264	844817860	0.206428	99763949	0.316811	1589492368	0.248385
1207586182	0.16006	1302173509	0.142085	663891359	0.40454	604876569	1.08969	545592679	0.392981
587936542	0.200544	767860683	0.184535	792588309	0.27479	580255887	0.89517	1422964693	0.179425
753658122	0.207664	1117012514	0.175833	1241709273	0.286639	631736469	0.295437	1291711477	0.299483
940226482	0.157346	884494004	0.213167	1215375422	0.184274	1430489410	0.444204	833569511	0.205558
635344608	0.325114	1426893775	0.174746	1791531325	0.260601	1097472148	0.283849	1663720740	0.378376
1032667107	0.190423	899653510	0.250043	1251632176	0.319646	2814509510	0.224766	691112477	0.194498
1008944392	0.148234	1050788260	0.201258	979217004	0.23408	692347331	0.454479	1183246501	0.200104
1055922788	0.0983313	1188037981	0.235582	956591488	0.262569	853527783	0.202184	1167846529	0.287964
615341270	0.185341	910009323	0.116269	800695527	0.334082	692639836	0.413179	1384534696	0.214782
574627968	0.387588	721427541	0.297759	1242604324	0.273713	1747739482	0.169445	856570217	0.336109
467332015	0.394151	938096320	0.29971	733075468	0.346625	1309811685	0.211492	1011746353	0.301012
1236192074	0.188764	1113301213	0.143294	822278685	0.219976	1514754147	0.199643	1197139869	0.277019
1002846369	0.171336	610075355	0.754287	1320544048	0.202035	197127768	0.465201	696675521	0.383347
519037524	0.226672	1453225331	0.42756	721264295	0.397708	207335452	0.478846	775875066	0.320903
557723522	0.165592	1170622360	0.219795	1373585162	0.241812	473059093	0.415333	2091308844	0.31849
809578965	0.15932	933345891	0.162098	1319746973	0.251971	657725449	0.210008	893519831	0.362084
1206352378	0.221099	840418823	0.237101	554899209	0.533534	676138884	0.392889	923406323	0.378536
521468263	0.0762031	1386264799	0.165042	1637629666	0.263593	1243828147	0.316157	837842055	0.281662
446925887	0.0759848	870882893	0.215723	689577372	0.279902	1424060415	0.237894	753188940	0.525309
1029607030	0.184264	684565262	0.224884	1342247112	0.262568	957743026	0.276327	675022704	0.201844
694171350	0.201027	508490999	0.253829	684299633	0.292061	1338456460	0.27742	1758140047	0.441375
612391073	0.17678	1089092209	0.166748	1878277789	0.201126	1078019762	0.260269	1381709163	0.200501
535140876	0.297582	695464065	0.180274	1652596247	0.408428	1471099008	0.253896	835012956	0.400427
542242106	0.384759	1356155912	0.155262	1021320327	0.340375	1815757497	0.125315	1020433311	0.273394
682188391	0.171034	685360424	0.361524	710959532	0.4536	640639201	0.243744	985800824	0.3668
677178969	0.207236	657670324	0.283922	1008000887	0.256492	853983774	0.390947	957517758	0.209489
1180928328	0.171988	2180067977	0.133479	644655283	0.422292	1177634502	0.391701	723901003	0.182551
677588006	0.165552	717707313	0.15507	732616710	0.703861	715750147	0.424161	985076418	0.196772
633575712	0.183994	1345100234	0.171127	626800620	0.366289	849003894	0.266922	831431111	0.139552
1465597599	0.15584	782524132	0.309833	861410177	0.330237	2068207762	0.136316	852250081	0.272135
526422872	0.221026	607584532	0.368188	684385360	0.443168	1592031659	0.0324324	650610115	0.31409
1339870814	0.162466	1029276224	0.255549	1027672651	0.300819	857532716	0.279105	920231943	0.180947
560850875	0.354411	603362858	0.392297	800724244	0.41597	691703340	0.49752	1127503605	0.248099
606711227	0.22893	546928382	0.247705	1122640405	0.212163	1473558895	0.262482	1556525204	0.288899
747078531	0.136779	686291178	0.290353	1023460974	0.229711	1650636980	0.245508	836335529	0.375875
829459144	0.132514	575649528	0.271366	869669350	0.245855	621083927	0.291213	1061648674	0.233692
1148796106	0.103841	620403016	0.137666	1712586553	0.223734	711756816	0.25328	1114669572	0.26647
659331328	0.204061	563921491	0.147314	793752924	0.231627	1353144582	0.319127	993976038	0.138371
1029589822	0.157338	1443297779	0.18723	1271612348	0.44144	1796157662	0.369616	727030423	0.424435
505518222	0.218027	684939618	0.690928	747423825	0.379681	575468386	0.275734	835702105	0.233518
659055319	0.224717	609361103	0.356391	978166302	0.242475	2863830277	0.191819	805617546	0.353285
1045881042	0.230442	613428743	0.292862	858161152	0.163946	860234090	0.226571	1280762467	0.209571
959939597	0.138778	1268617643	0.179226	1458117692	0.274879	1538970506	0.28172	792896690	0.221366
850224320	0.0920311	733493397	0.23646	773757838	0.505999	1054783216	0.430056	696656304	0.288167
561921077	0.109702	900223224	0.204617	1419237373	0.332149	633970027	0.268717	1165357347	0.189646
579640206	0.0953376	769487289	0.196929	1636735498	0.202565	1387608689	0.180674	1399988136	0.144641
1219238773	0.110069	968928502	0.15816	834807024	0.437271	1536896109	0.342321	1465346389	0.219011
583773158	0.134148	1368747897	0.123759	807441018	0.283711	746121493	0.301892	1598958921	0.167487
903947736	0.131798	590124200	0.399487	805459508	0.478886	1012745118	0.212445	2443908285	0.131688
1073495184	0.173519	867616608	0.187308	1803842669	0.205067	890390710	0.247986	1605269702	0.265593
578800364	0.178711	641350185	0.33588	665305373	0.557407	684023932	0.314398	1432397945	0.286314
874443895	0.164626	1015150671	0.169415	897137431	0.241117	1167938306	0.262345	701962210	0.229673
618144521	0.325091	636817660	0.259924	1944821348	0.231303	1287310596	0.416188	817286965	0.276829
1145636754	0.124524	605379621	0.399113	2065640275	0.245765	762845275	0.330725	745997074	0.175894
570147142	0.328672	965420232	0.148407	883327655	0.276839	681696357	0.193547	988913338	0.369808
790829756	0.247107	829840012	0.198399	1916153780	0.2896	1177091915	0.264712	1709831992	0.272363
932221958	0.18999	1445576326	0.174519	1009340444	0.327548	1302722242	0.251071	523597907	0.275376
735002915	0.201209	695263613	0.17771	842395011	0.350462	908585891	0.267649	626651640	0.392711
673519851	0.226937	1502210106	0.156741	1086124471	0.199712	926841524	0.281242	771598004	0.231657
721282603	0.443234	651167222	0.260498	624594788	0.587654	999498225	0.216771	1726998727	0.214421
1129010955	0.205786	807877203	0.280843	1064750799	0.326105	807052857	0.207271	814670205	0.272698
746330227	0.515391	802714320	0.344405	744622485	0.320775	1252106107	0.331703	1119337038	0.310345
884873325	0.205397	1786220427	0.153803	699656799	0.38222	807050364	0.199672	828142251	0.222026
1187939258	0.113603	1383256652	0.088977	736001062	0.263387	939927215	0.203527	677732493	0.225285
1297840379	0.127841	767573907	0.459748	965291049	0.211005	698878192	0.117369	701253180	0.201761
734087436	0.330344	1532398981	0.153401	956905990	0.429818	1348690330	0.513632	830837012	0.159699
538922318	0.282402	675530356	0.251983	675866149	0.339194	1546110875	0.263546	1060265133	0.151082
1427957053	0.119363	953911177	0.159458	939927857	0.179602	1308294512	0.254947	899012958	0.304065
707091036	0.247436	1882777869	0.166582	874013748	0.235777	698451233	0.270494	1789245594	0.317202
795960623	0.179208	834741485	0.256171	812461884	0.354655	724544219	0.272926	1337378292	0.179575
1162692802	0.128659	568334069	0.333985	2312362906	0.199233	1359815115	0.468016	1630005018	0.269003
640345494	0.747997	1263167525	0.186537	1149542071	0.207917	967174509	0.387429	1216924835	0.470618
947387727	0.192983	1043077739	0.266253	890607353	0.198828	1524013151	0.165231	788874414	0.321246
833914674	0.208207	718201986	0.182247	743851621	0.560106	1199664354	0.372201	1067661330	0.461436
581957404	0.209188	551848756	0.178856	733897901	0.116178	670475680	0.624986	1521928457	0.187749
619942316	0.146612	715130206	0.214181	684559411	0.367621	1363457484	0.38464	616974202	0.441369
678352187	0.228397	1547012486	0.123537	804131693	0.228817	1513583094	0.857194	884819381	-0.245833
532880358	0.213909	794349996	0.240644	780528794	0.400919	2004077265	0.344237	1400076639	0.0355731
849780280	0.122339	1653358797	0.134116	921717957	0.248418	731534935	0.213719	1473459067	0.194831
810463163	0.145267	585453968	0.268319	870761953	0.213106	696307653	0.18241	568458509	0.0915663
603241389	0.218155	980419448	0.167218	1133219526	0.218651	891931335	0.265182	702384844	0.514302
575161086	0.135251	1180527641	0.189013	865572490	0.362645	1449239333	0.261598	739727663	0.531043
1091030628	0.45414	593252266	0.283349	727076719	0.33	591484371	0.205819	708587279	0.802082
589678659	0.178281	856973649	0.143976	846836272	0.281789	928062455	0.245085	684275900	0.436975
460626059	0.418066	862112726	0.150187	1113797644	0.297327	661020776	0.307322	1534609695	0.257947
466016882	0.118518	779463267	0.184277	1083524405	0.309015	1395760243	0.268048	751938958	0.373351
530242089	0.215321	1443388398	0.161011	1438547726	0.161215	864423361	0.15733	1838955302	0.298953
1181651369	0.151067	1109813957	0.193455	1612347072	0.220035	1542556742	0.290044	1452962206	0.547529
610928810	0.215824	686266434	0.187354	1375342187	0.306797	1976199851	0.214707	764705793	0.505382
610901906	0.517735	852495868	0.138737	749485210	0.439357	1330324551	0.148319	1591263102	0.273872
790092154	0.23423	885844188	0.189523	757298801	0.464378	1431119410	0.181303	671382056	0.275096
1379327622	0.161792	731296387	0.225378	936078576	0.237022	1391413659	0.250335	1347800133	0.181046
569502626	0.441074	862779835	0.119126	665867809	0.471	1157017272	0.143584	1402235440	0.251092
839370204	0.199707	1474460014	0.226763	1068542627	0.159134	1697869392	0.519015	893412125	0.351246
511389119	0.453094	964542825	0.145207	739643477	0.366349	2832469217	0.184263	780118217	0.381246
640778434	0.406105	1141932006	0.202335	914522857	0.23022	646208747	0.252627	1719354661	0.173118
651868398	0.395626	730840271	0.287163	1266539908	0.225521	659809071	0.284861	1950579912	0.539334
1148877607	0.205789	1302707161	0.180404	1433828772	0.275033	753435701	0.241981	936579801	0.162362
637443665	0.271934	693642118	0.258435	1215472017	0.280343	722725877	0.237262	1230549553	0.172268
633601037	0.161987	634368475	0.23533	805600154	0.449513	1807017554	0.179549	654153990	0.115525
661676664	0.258486	1038891977	0.196035	945771759	0.357863	516398898	0.391882	1614659856	0.24021
1092186000	0.13759	1167706991	0.221882	1176123221	0.264302	2049901528	0.153596	1397460566	0.175342
607615489	0.210393	1196700030	0.243856	889575297	0.52674	341373145	0.361508	1115268096	0.332795
648885427	0.184501	723816417	0.154031	1591392265	0.155666	620547237	0.422867	930039639	0.248821
707313645	0.135219	1037034995	0.189612	797685594	0.605213	735234029	0.249825	1193179997	0.221195
729423396	0.186934	1562395081	0.168107	818537465	0.440025	921477490	0.348703	788268204	0.2648
578502572	0.187673	1235642962	0.113994	719593848	0.239132	695896691	0.0277778	876500645	0.18772
707104697	0.112103	646743328	0.42989	936829615	0.373583	1741772354	0.249473	631604758	0.333817
681963091	0.1903	771733320	0.162559	1262364605	0.346559	771914479	0.138946	844736409	0.238717
531652110	0.471435	893444399	0.199237	1265453766	0.252068	823164915	0.129263	921683011	0.243176
657155672	0.370362	684201909	0.0949744	1943807588	0.22161	1216456319	0.179344	3062927738	0.621276
647560008	0.478709	1587571139	0.13485	773973663	0.106417	599138243	0.122246	1140332409	0.238012
642370112	0.298738	905535277	0.124183	1723933455	0.194033	1096815969	0.244855	829097361	0.253745
615610852	0.276703	797388178	0.113629	1474960644	0.179485	571750332	0.239024	1641294757	0.366815
1192399659	0.206576	607292988	0.397648	793589378	0.207742	684857246	0.231552	1040038207	0.268552
1260463280	0.118388	603559162	0.382299	606930205	0.281223	1188602138	0.429123	1525787852	0.295843
1259496619	0.18666	1079270332	0.198628	845181103	0.226542	721905102	0.346396	1389252123	0.248247
1060199995	0.209648	725050971	0.288288	1308241186	0.209685	666541135	0.207862	780395489	0.381336
664634093	0.497925	1469715215	0.169272	1223737383	0.226155	1444593494	0.250994	741817550	0.264109
1446148060	0.179018	591179385	0.272685	1237626649	0.237933	721313897	0.343097	852695413	0.526303
574557695	0.314828	548069417	0.269947	1573589731	0.188772	1313391137	0.173551	786054363	0.246273
639078156	0.241715	675882250	0.429091	1321432828	0.21571	641952576	0.256933	790819467	0.309969
545208940	0.10624	881556427	0.290791	1000898557	0.312345	567600536	0.297857	781866159	0.245517
2273186025	0.105432	758488248	0.188113	770715083	0.303806	1518595928	0.204192	801826929	0.225664
705928923	0.187783	540056186	0.346219	701059251	0.335692	1532616129	0.213546	1096627119	0.266275
710596629	0.129657	1281097171	0.247509	655441014	0.395566	1346338670	0.26711	1393756908	0.267523
1155215904	0.117329	1235113874	0.196348	762735808	0.213118	1807065624	0.246827	819700191	0.169531
603181073	0.277431	677962205	0.311352	831741839	0.264358	740837637	0.326645	1807935032	0.174907
735340719	0.23363	641039510	0.203556	953836697	0.448238	1379769353	0.253492	1166663441	0.330639
734419340	0.194661	957150888	0.215774	1237648849	0.289261	1386722211	0.186178	841688002	0.395667
858312548	0.568403	669546200	0.284723	1299481815	0.412459	1513372088	0.208716	951993915	0.229821
716831295	0.42359	573097143	0.223337	918164845	0.25724	698591697	0.151268	1313760693	0.277955
929473463	0.13927	600762268	0.241516	1249898174	0.341028	1438642268	0.314919	1131923765	0.394098
671057035	0.0743405	714227984	0.388799	1401230086	0.333291	1240615078	0.303576	1772868197	0.209232
967611767	0.147709	600400048	0.258474	854058406	0.313189	1067055556	0.180761	709722395	0.160947
712369503	0.209786	1224733693	0.200999	1348490441	0.199477	779057359	0.259689	1381332678	0.220349
703438749	0.0912675	725516035	0.292917	792673374	0.308555	410667596	0.204703	1183529985	0.216456
699188411	0.227091	645920659	0.401201	1294112337	0.351893	853226762	0.254232	1077634618	0.235508
681806894	0.182454	720958510	0.109285	992378630	0.244331	1837885463	0.219746	1684875809	0.369406
616759056	0.262869	601572191	0.230919	1455733960	0.223923	735817986	0.518414	769309243	0.180834
758303098	0.00348432	1350733681	0.316872	1281927783	0.215986	618534862	0.307174	1688844592	0.493449
587632494	0.498064	1226768919	0.193719	1633185827	0.328337	981138277	0.211389	821689044	0.160337
887626933	0.145848	584855575	0.490456	979708982	0.219924	1447851498	0.54467	577749877	0.232823
751821202	0.19001	1303445890	0.363189	1708572383	0.306994	1669046981	0.352683	1157331336	0.196195
590023768	0.327328	1384422047	0.239629	802407282	0.423518	1398259432	0.253963	1213391943	0.364021
531737640	0.434523	836433494	0.207995	706962584	0.46488	2496571445	0.151411	1168191934	0.323041
499039082	0.385499	617393247	0.146724	756959330	0.454524	870342561	0.263904	1157243495	0.298787
632532622	0.199075	633468532	0.189311	763551685	0.175622	765593311	0.278937	1372695835	0.180089
1419145425	0.222635	723430058	0.366946	729264548	0.262974	626013765	0.166868	1511518703	0.25661
651078771	0.280249	674963866	0.217846	1732699466	0.34418	1139615232	0.181291	793304392	0.220445
779745846	0.12848	515670216	0.132585	1171661959	0.303777	613140424	0.347541	1601961069	0.208462
646075357	0.108342	1080777728	0.135317	1438724002	0.35315	1418088697	0.176078	616537151	0.350546
1322144204	0.138767	596139426	0.303592	999653570	0.215183	769933443	0.274745	1083934648	0.33919
679707343	0.197744	673852840	0.214423	726901644	0.287297	1241497880	0.111563	798146850	0.251415
1437264388	0.151887	734843092	0.167163	884719015	0.247329	1091504455	0.156916	777565847	0.847493
1321106456	0.253512	894454363	0.137845	948005903	0.211372	716896337	0.379927	646142269	0.249871
646355317	0.199962	603058533	0.418743	1019856349	0.19602	772263878	0.286155	694808567	0.288169
658772888	0.384016	1182307440	0.174695	1026412320	0.327081	670595698	0.337625	1354000109	0.244415
667299914	0.402602	1027192535	0.186357	645972569	0.334657	964962188	0.264232	566979094	0.401659
1215003756	0.246559	613818804	0.366868	1234148794	0.279514	788423414	0.296594	1567310542	0.300523
542914403	0.244154	890113312	0.265741	1566569845	0.210876	2780242213	0.318252	965340049	0.301806
509965451	0.410204	801372498	0.0298507	749454981	0.373995	543478438	0.337616	1113857634	0.217193
633802001	0.231825	662255275	0.265573	1352972184	0.312229	780902537	0.58179	718831407	0.526909
972284756	0.203923	646093159	0.296259	1019010790	0.271197	579549165	0.300694	992859150	0.178069
1385457447	0.174269	580633202	0.14658	647190848	0.312713	826422687	0.266957	1391767111	0.399152
758849927	0.117374	591943276	0.128002	1141035661	0.383704	664817642	0.376101	881373714	0.266096
646382918	0.233433	1262505653	0.276068	1511027229	0.226083	1360545547	0.326111	1507563509	0.263324
670858295	0.33092	572524832	0.311617	781590934	0.322089	601577640	0.418554	654055932	0.28491
611403705	0.342815	742067466	0.155405	728529108	0.302576	1734813623	0.198912	782749703	0.784227
700320818	0.260634	982042802	0.184632	714751392	0.321282	1841270334	0.44881	692117802	0.47396
608234260	0.203876	1107302329	0.142971	761396136	0.49544	782241748	0.198604	1644071913	0.210477
1217382676	0.106268	1351109625	0.212907	872008750	0.326456	857800210	0.178684	1519154989	0.327746
661850993	0.343148	755277674	0.30744	861254530	0.47779	2888656941	0.477769	638177808	0.246245
639723018	0.299824	702148344	0.251511	662346578	0.622764	631456954	0.657071	664859269	0.374803
568267701	0.135028	715921774	0.216198	1094540190	0.25983	2746252340	0.208994	711139326	0.186778
515404540	0.270553	614885095	0.218808	915215970	0.199388	756130029	0.298747	1633842851	0.248136
513759253	0.195659	1269978677	0.186374	921836974	0.47048	1028229799	0.166264	615031665	0.586569
734392580	0.142955	526578968	0.141591	714033524	0.250825	656434865	0.221499	1771444733	0.188856
541643278	0.606411	714796148	0.239026	661988987	0.418454	1227161906	0.396824	1403211727	0.211755
651047807	0.167677	1046538236	0.159373	694698580	0.320583	2964489226	0.134745	510214899	0.415258
1596024682	0.136725	715454841	0.207311	822385102	0.329053	531203268	0.522985	1374394071	0.183003
1454554083	0.124856	614442501	0.347703	827473762	0.321693	1197713306	0.185212	636425297	0.44416
1331601388	0.13669	660399226	0.196454	1406903460	0.252611	1215048696	0.221299	1502686512	0.434732
962517319	0.211963	695058627	0.208691	616802759	0.208697	696245622	0.16005	609483915	0.391355
841872793	0.123364	806285748	0.288493	829470965	0.235306	581463303	0.207655	693020219	0.41692
637516492	0.119208	1029623333	0.223427	862351707	0.248052	850217499	0.26451	1119327410	0.637052
690863271	0.291782	1547697129	0.220127	1477730814	0.176685	1105427227	0.295889	664955021	0.380574
1200737414	0.201661	548442621	0.364684	813864284	0.269917	737794452	0.182647	707186218	0.661465
662624745	0.320296	681394108	0.417346	832659604	0.353037	1445280982	0.304473	698825093	0.266077
629250155	0.174139	1056328750	0.207592	889197666	0.256165	1315923433	0.195329	1083701390	0.177755
518952802	0.234826	699979060	0.2497	840485956	0.365543	750707667	0.26945	762685975	0.487087
585875668	0.255039	697422086	0.14032	1257311009	0.205364	698229793	0.205948	817866544	0.37067
1110020756	0.20975	1477364226	0.134576	1965338790	0.178087	1265249117	0.256238	767009420	0.252668
600311801	0.310667	672225416	0.2428	1802974691	0.140966	1025119228	0.34369	1546153208	0.272474
828147735	0.146216	1251318592	0.343476	1640207192	0.387342	593016604	0.304706	591745981	0.421329
1115526572	0.168451	1227892346	0.249299	814338727	0.173276	1393055323	0.222508	1394562538	0.164391
809203628	0.145565	1259228686	0.313174	1785593316	0.252842	740614206	0.197454	1146255447	0.197882
1176700537	0.154783	574850450	0.256591	1075718264	0.199944	1315366653	0.268984	1511724454	0.186403
1102173199	0.215019	1005239752	0.280983	695892999	0.368719	1474488120	0.476856	834337361	0.272221
686206206	0.142187	560762728	0.566299	883651930	0.162998	1498668201	0.250839	2181701475	0.219362
717006253	0.200709	1163485248	0.191624	1696894990	0.242511	1298775755	0.285592	895416643	0.30789
626748159	0.0929778	965668571	0.169648	712396910	0.275236	1252801183	0.258306	1424653970	0.161191
512396439	0.215625	617505390	0.285775	973380383	0.296025	843816041	0.212246	1262883895	0.224482
1256339520	0.115164	619760962	0.289019	1045561985	0.128662	1511410156	0.0515759	1053374865	0.302688
720773555	0.169347	771666186	0.268114	1074183148	0.237369	1092764449	0.187193	1369576602	0.183646
958200577	0.116104	263588327	0.262716	1111663692	0.167093	752201148	-0.130952	1092322860	0.263389
862828661	0.130113	467001922	0.245967	994740206	0.191501	1246707168	0.230761	1332116401	0.147297
1006351075	0.119487	2344591064	0.107522	972284421	0.283435	1767208596	0.258145	743316369	0.144417
854011044	0.20884	622369453	0.497264	784836220	0.160134	1414701603	0.22102	903003150	0.338635
636699479	0.213773	547948217	0.239448	818037635	0.122222	1323133721	0.187739	1254882277	0.21052
961922953	0.192959	1678689248	0.127514	836899028	0.430116	781104848	0.301859	1446627702	0.244461
671590499	0.165747	920435641	0.169946	1507211378	0.202526	734729051	0.237374	775116814	0.359217
1256305796	0.146458	1892633222	0.139054	893529699	0.218513	1123795858	0.237425	867412527	0.57778
491392588	0.103761	676859162	0.189252	803963426	0.156727	590237753	0.239682	780954392	0.596331
802281730	0.191224	1644179023	0.219667	704721291	0.232909	895797632	0.313226	1510234270	0.276952
1044159932	0.154838	970065872	0.225588	821850367	0.243099	640616889	0.249809	1550168644	0.272881
1030673898	0.151612	562835875	0.205548	830400236	0.21718	774254506	0.322021	715883716	0.399502
713027359	0.245355	819723666	0.178549	1074968436	0.256675	1909521527	0.212691	816958529	0.491054
778080877	0.187907	1127974014	0.185615	1198421178	0.242892	694199250	0.166455	841090503	0.279297
1504793256	0.124802	466502271	0.276643	909933277	0.29934	762228498	0.210227	1042320900	0.239929
596691264	0.228945	499719941	0.162306	1363221264	0.186472	1436428441	0.28924	1332244780	0.230937
1175803858	0.148897	608976808	0.213854	1244499021	0.250335	1538295417	0.14338	676873480	0.188272
629816205	0.172076	1272482025	0.149686	1290674805	0.229923	883152490	0.305567	767043949	0.310945
1276838631	0.112384	639211722	0.253788	723992788	0.473467	588544257	0.370025	812653283	0.29516
962457337	0.117931	673177330	0.259822	678009518	0.335449	2194556475	0.160172	1469666473	0.381022
602150072	0.320989	1322394054	0.144343	689215225	0.383723	709106148	0.285099	1038538406	0.244164
763700679	0.151493	631004988	0.331992	829342790	0.349483	781938783	0.243117	586793858	0.37279
805768861	0.169919	1147014986	0.148832	1636260760	0.247966	1174902078	0.266914	1409370624	0.259227
889084725	0.23056	582570303	0.323566	655977657	0.189795	1431217727	0.663676	686445627	0.453836
1169501346	0.174638	597628860	0.255338	1157950473	0.1608	758712411	0.560894	683047543	0.405174
1341577088	0.144202	572598633	0.406478	867726008	0.218041	1297501380	0.309185	1177227214	0.22827
803738626	0.187222	1036976673	0.200188	1588434493	0.263624	603993776	0.225476	1113582054	0.257291
1189547747	0.308409	781485324	0.142522	2548699852	0.1361	965264680	0.300233	997215577	0.200989
761841497	0.111586	1595489745	0.182297	841515830	0.16351	1289540506	0.332589	699693430	0.298229
941448586	0.246452	1630973821	0.219075	1124837234	0.183109	675570944	0.265304	850558259	0.293808
687069718	0.267417	744565120	0.158663	906054297	0.225411	1535107869	0.180804	646383448	0.357022
984357162	0.318757	1238513777	0.23629	1227538840	0.175749	663567777	0.35254	992789285	0.190741
752072635	0.132057	1011210261	0.199099	1371864338	0.239507	979149452	0.38072	1126889920	0.23042
1377249842	0.179017	555708800	0.235347	1675069970	0.162413	1276352646	0.390183	1157268286	0.187948
703710761	0.51965	1311527567	0.142102	754902295	0.437339	1510117947	0.394976	664405475	0.15264
745490556	0.161179	705844776	0.415584	1779287832	0.261411	1005294254	0.142534	916249981	0.342279
884059013	0.154577	219402627	0.461645	1263157812	0.159923	687848648	0.466742	709318571	0.314384
666635785	0.219735	329461233	0.441636	781349340	0.417727	1115941738	0.307147	736510191	0.204608
567308382	0.237447	607574759	0.175378	855661361	0.189036	516099629	0.275655	888366282	0.196633
984683309	0.194822	621556117	0.197117	1488876206	0.235392	1305259758	0.246562	834481968	0.128554
212809156	0.300928	587268339	0.291908	789808131	0.59415	1103724241	0.138097	1074387097	0.260572
744940530	0.25609	653471927	0.4238	1327736455	0.222421	694010168	0.355918	1457855092	0.240395
1270623790	0.142062	595789564	0.199094	753583123	0.455635	754386012	0.269038	652684079	0.189419
566694108	0.427548	734438795	0.143022	703121721	0.0723192	1449804484	0.229954	1464185081	0.253991
921681048	0.133618	652337796	0.125457	726005853	0.203723	612954079	0.210261	1650001086	0.178928
716490772	0.483915	894173872	0.202348	1052329892	0.154254	1004975897	0.353615	873719334	0.203481
669959496	0.360787	1440371832	0.193262	1579384396	0.190192	841298552	0.350934	1064758740	0.183176
924703139	0.154761	780724551	0.165791	1014147211	0.211404	639843027	0.252388	1167486623	0.185945
463902593	0.482635	1419988764	0.240266	1733096374	0.184009	698531966	0.342368	673832632	0.348934
587177521	0.217459	954678438	0.216696	1486756243	0.177846	968569836	0.342574	1391761899	0.244727
699912965	0.309749	1248338506	-0.0111732	1691834689	0.228546	1660332062	0.746668	1100230914	0.152664
1496536568	0.121974	759762209	0.176997	796740140	0.480578	954733059	0.224406	788874118	0.291526
819182050	0.17311	1569437328	0.148955	645226525	0.222737	604078955	0.482302	600833816	0.379366
778511413	0.190873	1382158933	0.129011	928754550	0.354911	609541572	0.504238	1113418551	0.193094
950116000	0.170155	1372014880	0.169087	1369424206	0.24237	2586969444	0.213011	942419326	0.375059
559506361	0.259994	577675964	0.486007	851179271	0.368778	592953895	0.582757	816654567	0.158599
871641459	0.168966	533279023	0.410998	1595887690	0.294129	755096282	0.285097	743386858	0.453021
739933208	0.202272	2304653123	0.109616	991928305	0.308425	2504523121	0.186781	1214970585	0.259559
1671893984	0.348924	682144386	0.215434	784580968	0.353802	1152038499	0.232777	1500505072	0.18135
633462085	0.140326	846719107	0.176075	781621253	0.295343	1281078318	0.261035	1454180482	0.311559
1208964591	0.177508	661447947	0.172485	939174934	0.300242	463442167	0.368824	835768016	0.295945
747191634	0.190663	778415445	0.233522	711062768	0.268162	1437962024	-0.0902256	1240737991	0.298997
658290086	0.105579	1057643099	0.176578	1568247683	0.1276	1283189387	0.642081	918343507	0.238979
712038759	0.200946	1250089599	0.181167	1154921591	0.106224	1327629682	0.754321	1515035685	0.372841
759054818	0.151751	1416033501	0.161736	1034134733	0.211273	1201814342	0.299828	961720354	0.305318
1167878698	0.254258	654785991	0.246094	1018431596	0.223268	1342598793	0.360103	1573806654	0.20563
705610411	0.373998	1309307640	0.168726	716817788	0.232655	1478897339	0.193301	662492125	0.35046
1411892984	0.195149	1130237724	0.142136	1262760069	0.17384	911163770	0.238647	702830301	0.303529
1306158945	0.178656	765973437	0.265013	843112808	0.211055	1458151014	0.194287	742020225	0.246537
1393744223	0.147131	570859879	0.292851	1201739198	0.162864	1947178911	0.17397	632503218	0.635039
560672737	0.151711	898392605	0.175982	749641678	0.302368	1035979280	0.179205	800139243	0.411733
602577217	0.274794	806991985	0.321294	907403807	0.216773	2506379668	0.151673	665085982	0.306829
1413292981	0.135401	991027234	0.264899	1636582793	0.67119	845132573	0.168659	711673766	0.304988
733671370	0.221978	758662727	0.300007	1224856392	0.195909	531251751	0.266207	1464623109	0.240568
676329268	0.343348	731124289	0.482304	678750527	0.330333	608703213	0.247882	1383219962	0.356747
612186692	0.446293	268651061	0.21114	921690966	0.18056	1233822995	0.440377	934746510	0.224844
852466619	0.228917	1102722724	0.528951	706482966	0.149646	596005045	0.301765	730228673	0.409653
1265171338	0.136075	647823327	0.435267	1334534974	0.130131	1280310986	0.202583	701287238	0.388884
629486604	0.425789	684537871	0.340217	662847606	0.296819	1130454929	0.152346	1335172840	0.233924
1050221817	0.229469	676675542	0.144589	795898469	0.298737	767742883	0.395039	1260988237	0.23156
1015785244	0.141453	1433471023	0.156074	1052941861	0.393619	686776186	0.620917	1048549327	0.218826
1521349523	0.232556	647159011	0.159345	797661008	0.145346	776992949	0.317281	1314671618	0.208408
730942523	0.242773	744987770	0.297853	1362767249	0.133327	740569181	0.288434	1317802091	0.311089
655621225	0.237831	1351219163	0.182979	674039149	0.313625	1234311531	0.338148	877837937	0.269383
1103655987	0.127009	1354514765	0.235555	824050744	0.296641	1137982571	0.240116	931998905	0.316399
691320169	0.410968	1225139573	0.161091	832788493	0.231209	1183975235	0.374955	621442644	0.431901
618363590	0.389761	1074419076	0.185385	1009272730	0.386598	676096834	0.346457	722815586	0.481787
585027866	0.378967	869190131	0.201329	1254888656	0.150958	926182094	0.229717	707430591	0.250324
745617713	0.102141	1287891689	0.164042	862879359	0.348635	287122401	0.560943	805933632	0.380613
912742668	0.121027	837509744	0.250269	687394351	0.22437	1316915183	0.175167	754098838	0.374892
692021534	0.101373	699074527	0.23995	1316179094	0.173442	697072673	0.505533	750097742	0.359266
789576563	0.198307	930302890	0.120292	1576483969	0.205648	1302977603	0.127784	1465428841	0.604467
1197456305	0.100606	743030374	0.708779	1105066197	0.180153	3012279800	0.209725	746061704	0.24297
696885100	0.158261	1423296702	0.155851	833309901	0.183299	606320552	0.529397	1373977382	0.230502
1136412529	0.102719	638069525	0.387917	832591880	0.263787	540402907	0.536774	2314641481	0.182114
818588272	0.143706	1422265730	0.140186	1388029319	0.204415	559633082	0.230422	745106196	0.215251
1227632966	0.131462	705200080	0.38679	1276501755	0.141153	689196656	0.299055	1215999803	0.21107
825525870	0.209232	726905105	0.246111	980473275	0.13834	1555076657	0.163108	1317947000	0.1967
721904314	0.223779	756885577	0.35898	654235758	0.307495	698484227	-0.028169	2472324724	0.238936
1083940264	0.143623	700006606	0.224849	776395221	0.244837	1129833333	0.345403	461428692	0.177931
1271111487	0.205731	1797451370	0.150748	682073581	0.190081	1012266907	0.180263	836070556	0.358238
638055882	0.114867	1139785636	0.135172	1678127648	0.16868	682328890	0.537385	679484459	0.825306
740191305	0.229887	1247321690	0.25909	1370249917	0.199052	1479545386	0.342109	3219068411	0.148248
1254721314	0.135083	1600019015	0.199603	1028443088	0.203459	1133022787	-0.154717	534856429	0.258476
962579598	0.189036	746489205	0.290976	758441314	0.223416	791747379	0.281962	754954889	0.227678
649312472	0.239848	713707124	0.246498	1323504718	0.161466	653497407	0.208954	862426751	0.2078
801077628	0.138243	816373821	0.358499	830517252	0.316894	604410498	0.259559	784412272	0.281366
656997109	0.304096	752137720	0.265282	1769705978	0.178692	733468652	0.324784	649008654	0.271447
687274516	0.0906593	893691003	0.222469	715378640	0.269852	747226281	0.329867	740509052	0.189972
770738352	0.448899	779620125	0.198628	793685555	0.13815	1819710293	0.228501	733222265	0.51196
694361247	0.471611	760370960	0.313191	795197631	0.254884	1398059891	0.170842	1312437768	0.154948
655048865	0.206767	739622636	0.167046	705816684	0.22883	1298872349	0.32132	1566216952	0.19314
814495703	0.243167	1261462156	0.142483	714398360	0.354573	964198669	0.25588	1586915624	0.270801
1369271620	0.220013	561697595	0.240179	763784997	0.462768	1478934674	0.20956	851316527	0.277722
650420618	0.203619	677485536	0.196935	769780646	0.449866	716170467	0.449661	1010718108	0.611135
813281871	0.177712	829619837	0.259728	727291664	0.276577	964871070	0.226103	630698075	0.391783
1422255357	0.152777	1434771335	0.116624	1000897933	0.128474	1263173871	0.344251	1316521396	0.325687
692902138	0.54245	1661649224	0.159485	821407821	0.245196	585217847	0.405442	1025208785	0.327456
1185542022	0.175588	1607707772	0.155586	733758466	0.332176	715824233	0.171176	915476305	0.19743
919805283	0.135187	1201397037	0.210769	844109170	0.342561	641699117	0.237277	713325524	0.285127
747260506	0.227792	1086277668	0.310658	1059282235	0.272759	1247535531	0.209344	789452588	0.181339
1372404207	0.199882	847338948	0.285795	822271569	0.105914	714921468	0.302445	721804690	0.136438
1442851346	0.253804	857704384	0.377559	744164915	0.446424	1218137888	0.203488	1069776096	0.241029
1198135523	0.212902	1297270386	0.21246	781859972	0.255441	1519469091	0.161055	685627899	0.135262
754048480	0.210732	2157164498	0.330858	1011860348	0.369845	1420533669	0.193418	954733792	0.259209
1409030580	0.131582	907200402	0.351589	1004282115	0.193239	655734870	0.345382	1749092999	0.262567
1090113873	0.129527	734530839	0.137045	839574910	0.258458	595932013	0.368271	754955553	0.241029
647899929	0.284079	1683441655	0.666271	833969502	0.343759	1348978802	0.220676	771771679	0.219525
1600065702	0.190114	1424062149	0.170975	764885700	0.281973	512714399	0.307915	761540955	0.216026
1190425803	0.205495	991488040	0.120666	838511049	0.31802	825628063	0.30341	928580821	0.268373
1381781170	0.139033	658881182	0.535488	809038481	0.311542	591517434	0.462614	725288920	0.186979
639006231	0.217877	671386167	0.432586	975329412	0.283786	689322050	0.380505	1144966446	0.202
753079776	0.329188	592615509	0.179054	720259691	0.234863	647550197	0.352734	698161196	0.226614
764981783	0.251157	858464835	0.125	2036264283	0.171296	760297222	0.215065	757113805	0.304913
1468032750	0.144495	634938937	0.446446	1812496398	0.241591	1188943180	0.258833	616249656	0.297452
788651477	0.193757	819247497	0.237664	1365831714	0.198284	755518421	0.26562	757208757	0.40663
886842530	0.136012	807786683	0.144422	602013158	0.227611	632075982	0.544041	726753456	0.385822
1096976006	0.0968069	1051626968	0.161676	474620951	0.168791	1089298090	0.454296	1037654997	0.210663
654312574	0.176012	798855865	0.12548	876616278	0.2408	800422446	0.41222	1470578787	0.258679
567211765	0.307274	1323829669	0.241659	825692591	0.268627	675352461	0.235643	741439048	0.304381
646291380	0.15776	1514248245	0.178195	747969895	0.244056	860076746	0.170808	875028170	0.265367
1259957669	0.221024	1182757408	0.283129	947286889	0.184294	661014166	0.199961	686207723	0.309036
482474549	0.236737	819634688	0.50266	788229376	0.239529	1251132197	0.204873	1575070757	0.343935
625079742	0.192284	756985298	0.424224	998498524	0.355808	611445929	0.289496	932787128	0.375116
740340893	0.189555	2877747241	0.15685	1335139391	0.145041	592097348	0.137635	709395194	0.284599
698807147	0.305855	1596984986	0.142082	1399245417	0.205894	1041315593	0.302794	643480729	0.396133
658665181	0.205781	651748453	0.325576	1598205557	0.166143	526382640	0.529926	840924128	0.26035
1128364177	0.222331	1009873095	0.268447	765479620	0.459771	611038318	0.249069	813307060	0.351235
1089635200	0.257635	1185230471	0.123893	925814522	0.179555	709816406	0.305965	727928199	0.240386
573929459	0.244177	706705229	0.213452	747025730	0.477396	692670495	0.292578	724544245	0.421763
1246520221	0.174665	735072783	0.0761317	746024051	0.171853	402863300	0.350017	657165887	0.199744
984390119	0.174128	510478047	0.139541	1001741380	0.127419	1067123438	0.417119	924352901	0.159261
715293299	0.163777	1197919996	0.121399	758246380	0.189837	1235911321	0.197308	1483273141	0.180111
1312256680	0.180873	1491027516	0.22732	1582645133	0.127597	737567725	0.170996	1671414711	0.116144
767270779	0.171285	1530547679	0.211216	738516894	0.223463	1060021388	0.268526	793785132	0.150135
632368557	0.145447	544922514	0.296877	835767127	0.401704	625470996	0.243388	1619565562	0.327307
748753304	0.129828	455743245	0.254542	1551707293	0.180398	1190188116	0.388092	1354702441	0.267945
1084799127	0.182588	1093283862	0.64034	1517700610	0.151621	795678775	0.243091	1329747169	0.194719
686900429	0.208244	1260038270	0.223336	1222178701	0.209905	692353546	0.514577	741657490	0.421967
1280439159	0.197825	1402299949	0.143683	1013671863	0.196661	1208528237	0.200081	722411819	0.329954
827089747	0.260514	1456387048	0.259467	1368946810	0.173564	1116265653	0.255642	570000603	0.237038
723052693	0.443025	1412624171	0.550138	1822393232	0.194739	579430890	0.298208	788485168	0.257535
1246019776	0.288654	944150594	0.165566	878092331	0.339269	628562164	0.268276	1465552190	0.170827
758688135	0.482591	725376798	0.183337	1293837770	0.251052	1286387383	0.136439	1322494006	0.254227
1243108118	0.206955	761146079	0.113667	868741524	0.274227	1269545999	0.265393	953159036	0.223692
809879225	0.282002	557996791	0.293794	732428622	0.189522	636425670	0.24008	687083555	0.284804
736807915	0.184028	1610895851	0.166756	913169020	0.183408	1014326435	0.154187	1574364344	0.260904
835336055	0.174508	633002139	0.614361	801715509	0.523254	815282950	0.163103	1158136424	0.307993
908167269	0.147123	1309353642	0.209983	801041323	0.213129	890290714	0.188529	1009149321	0.139674
1384500215	0.210144	1460848785	0.237627	1105332789	0.12697	645350196	0.481911	629446050	0.152944
1441500718	0.232816	1310097927	0.157113	587779574	0.161774	533233230	0.363652	871902468	0.2413
602633737	0.175147	226998904	0.137886	1286538561	0.367791	603998265	0.291395	1226402982	0.242018
850297640	0.149226	384515475	0.231336	1244224468	0.264121	950422700	0.130707	708981800	0.390621
926498358	0.149228	640413525	0.290889	1302547131	0.197196	786842597	0.129289	625923161	0.422522
729450306	0.267016	505934640	0.306466	856059303	0.231424	1459526417	0.603463	1552563489	0.236028
743534239	0.172304	610783395	0.30895	1379900270	0.233918	644021083	-0.0674157	1528803100	0.282588
811626574	0.290969	1353192327	0.191718	1328279446	0.174938	627630469	0.506019	863671997	0.273963
565127807	0.285777	693684543	0.174333	910898108	0.193563	749545544	0.0206186	723810030	0.383931
1382747119	0.176995	1371822393	0.232553	873586809	0.226443	710648727	0.47933	1027009286	0.290454
1267942838	0.110409	730456968	0.171792	938738235	0.306375	521922576	0.527368	790670474	0.337496
1459770357	0.151704	1373204215	0.176105	823051005	0.243763	779264551	0.255045	677191212	0.358921
765665833	0.158785	737952332	0.254003	822549329	0.217579	557754298	-0.17551	967672521	0.208893
811727883	0.104619	1089525261	0.245008	729139794	0.313802	887605498	0.363415	620764604	0.418828
690958975	0.169695	572393145	0.225597	984801064	0.273918	652988955	0.154864	665212622	0.16169
740586255	0.220255	977876175	0.214447	1196719564	0.178153	1547648853	0.481757	667206743	0.192809
925026080	0.202646	1478386677	0.133107	850578789	0.181444	771990623	0.230727	780409421	0.372484
586499280	0.397072	1154116934	0.154562	631651324	0.241049	706170175	0.397219	1564426796	0.444623
1163439718	0.133918	1597683345	0.213302	784342507	0.295542	758822946	0.61367	719230290	0.222597
547134877	0.242764	1518794275	0.220309	845100222	0.376289	665845755	0.663968	774850807	0.344054
1608817550	0.172113	663627599	0.374506	683779175	0.333199	1224403719	0.278221	1450017433	0.285439
1395700878	0.108046	595867201	0.18278	823793658	0.211533	666122227	0.194497	818163473	0.323061
490671432	0.296187	786529341	0.173967	782136177	0.262988	692810040	0.404795	625790774	0.243144
784149301	0.145271	593161573	0.346402	795277216	0.470367	892250188	0.309207	1316336108	0.215892
531159215	0.3103	691661423	0.154784	777510294	0.34065	499741561	0.481789	1470797274	0.160149
912669633	0.161726	1550706388	0.163879	792257819	0.162777	1464276984	0.352048	1260507524	0.205432
1065699908	0.232864	882262883	0.192214	1253528291	0.13588	1077072017	0.46098	826065365	0.327023
757940349	0.204969	592192025	0.281068	572210390	0.122479	669094396	0.356392	1539208120	0.250908
936987401	0.236216	784983930	0.216169	1264096079	0.118182	1234342287	0.407329	878929484	0.274883
741427558	0.122556	807473272	0.171033	1662049775	0.173798	730852653	0.146912	678777587	0.166477
1476439397	0.188535	615612633	0.166218	1496515166	0.210782	770816247	0.590004	918738667	0.323292
933458850	0.335924	1687256628	0.208109	864947756	0.286248	766863584	0.177003	1289806199	0.276802
636984721	0.149877	667642065	0.219387	1316293852	0.175702	1013222763	0.340127	812739160	0.387839
656107840	0.133888	717374446	0.23112	810606133	0.162492	746138505	0.340366	601311178	0.371204
857299590	0.168067	1018084835	0.189422	1046956100	0.196122	1321616564	0.11445	820471399	0.662877
675692100	0.162468	683869649	0.170836	1164082543	0.201187	602699139	0.293189	702855118	0.121025
717298025	0.302468	762622776	0.415332	1446040061	0.152976	707461987	0.384294	951259046	0.163624
808296526	0.128757	738781276	0.25768	1267996730	-0.00869565	1268007095	0.220207	987915613	0.162994
1119099292	0.229357	1455581138	0.180279	816935437	0.21469	967259446	0.460857	600607054	0.268802
833437154	0.201447	681817215	0.285807	856198664	0.276566	1247986116	0.20117	629703705	0.355627
561679380	0.349099	552192226	0.362761	709893412	0.223133	1208447212	0.179772	1034696562	0.273197
725160237	0.156758	686689895	0.373352	1510659517	0.211841	1173607015	0.324924	700171517	0.516402
891977433	0.167525	746823614	0.295767	1524792331	0.174197	1442924928	0.269451	778521007	0.225243
1369055978	0.180254	855181482	0.269476	837151012	0.219363	628150654	0.306896	579639835	0.558721
529395314	0.649401	644086443	0.278184	1067158204	0.17924	2468482327	0.211288	924853742	0.19349
1137352049	0.145051	578756033	0.340148	1415370406	0.220689	940283769	0.228863	692264150	0.196476
2059491114	0.126795	1421719217	0.168859	933787693	0.370249	1144974823	0.210292	720097171	0.226938
732439404	0.210115	566723558	0.135441	1198670824	0.167663	730293938	0.131484	745780604	0.36699
812304941	0.109537	847786726	0.232841	792751902	0.201712	1306930538	0.383047	747978027	0.260896
499804424	0.35602	1078897370	0.204178	720556681	0.356858	952419169	0.153146	590011483	0.170821
568541044	0.437431	690876972	0.237598	1020707167	0.151859	2295532954	0.214555	658821965	0.327224
561050767	0.153627	657457183	0.263535	993386463	0.235027	594904283	0.526467	820415135	0.394208
638522636	0.188604	566592224	0.290547	1691226578	0.171573	713138979	0.497214	1302778382	0.19917
594123451	0.446906	1129317476	0.2236	656443269	0.335781	670305275	0.436828	840488010	0.382552
303280092	0.403129	731177459	0.193625	824774516	0.42063	1150066088	0.252067	751515751	0.417271
857319304	0.129023	671236098	0.469143	841561915	0.210792	531910507	0.392936	722555135	0.406128
2474720549	0.149492	581296542	0.318163	725763851	0.432749	733910541	0.465675	1580401692	0.22608
578984562	0.191192	1325033200	0.109447	579125731	0.253408	1200846984	0.176369	844454865	0.57344
586876171	0.206046	704355186	0.200012	1707744173	0.429331	979765749	0.147681	1153738896	0.433885
1289107063	0.100199	534333736	0.134926	1639331747	0.33734	728115474	0.19491	1459614843	0.182884
958864834	0.186408	1191193375	0.170653	960884995	0.18215	743016697	0.243338	738145034	0.147538
693031121	0.199574	653508023	0.223264	819525655	0.492995	1237330947	0.162574	1140315732	0.24844
679012567	0.212385	1295206841	0.140298	877127951	0.445197	1611656061	0.494156	772096346	0.254091
648886638	0.273278	524750837	0.803715	1212366969	0.123624	1474437654	0.407087	729008314	0.371096
636802820	0.136801	975582064	0.149123	650551968	0.292568	1397811161	0.286567	917579303	0.36897
518985890	0.0707395	963208427	0.218436	1433740664	0.252386	304301637	0.635196	961376030	0.237631
806585568	0.194013	636328431	0.148774	1580333120	0.18086	841890608	0.18238	1248066979	0.298615
613044054	0.189981	931660852	0.256105	633211191	0.188393	295222375	0.742436	1301670144	0.239257
619822277	0.277916	665726431	0.272824	1115784792	0.168942	669341789	0.381726	691780745	0.379553
589438274	0.276597	415199700	0.237285	1101864038	0.194715	670619907	0.198541	1997138588	0.276788
709142643	0.141808	850512584	0.22573	940999208	0.146725	930114771	0.171438	650017476	0.348698
592985251	0.272276	741601228	0.15829	842878108	0.230419	795421638	0.274029	715405309	0.263614
543953301	0.237205	1208970541	0.145051	1358707982	0.233786	665268953	0.454252	696522725	0.208796
764555480	0.162241	1072110481	0.232736	1496081631	0.211389	926363956	0.16399	858189242	0.341631
839590006	0.20205	1432080344	0.210777	853922540	0.235115	1055992272	0.360542	777167595	0.279853
1175408301	0.18954	756213805	0.318645	772822411	0.314289	505971388	0.184675	1312096596	0.344663
831663994	0.121851	854290027	0.316972	767301430	0.285774	1364965039	0.157376	808020793	0.231958
575801223	0.153682	809567759	0.168318	812284714	0.175613	2244791578	0.176895	704400320	0.150362
633517138	0.128316	819109834	0.135881	944714137	0.258801	1000876152	0.222016	1294126573	0.17133
619702517	0.229039	558181927	0.365348	699415193	0.32136	743579487	0.585456	1975712116	0.170283
758050242	0.178311	722726638	0.313161	1109550484	0.236149	970893934	0.214145	1284436638	0.225546
540709749	0.440283	609741595	0.373988	737259433	0.190325	751232081	0.606416	1010106366	0.251086
635864007	0.111928	823690591	0.239243	845824674	0.174904	850230418	0.207816	1430661387	0.278896
563228571	0.199927	1488760024	0.389178	1710755375	0.176922	954384113	0.195746	1132792373	0.225793
780267512	0.148288	791590743	0.172247	1639961661	0.171673	974396948	0.197986	616516752	0.3281
434960142	0.408555	662377141	0.257309	1957627221	0.768091	1137279333	0.372007	935310359	0.168847
1146841390	0.281375	1303362955	0.23687	1473709936	0.219028	1263941453	0.261812	1111870428	0.257576
1278044560	0.149423	698001561	0.28207	1149992710	0.134755	721926615	0.180867	1145140359	0.191309
677491849	0.304646	874087146	0.113632	794176649	0.438663	502504299	0.569718	710449323	0.358116
1155081984	0.194293	1102204529	0.102253	829232045	0.341079	773808126	0.273613	1479597178	0.237755
1050819457	0.261629	1160218397	0.18389	933102616	0.252266	884570763	0.25947	1052203970	0.290228
870105852	0.145288	723941913	0.355035	1146208849	0.127228	652062090	0.169895	746970773	0.456033
555311461	0.138193	454968642	0.339884	732440845	0.374672	1321810154	0.321394	689441567	0.214529
839093249	0.178021	1030017596	0.0655836	682430726	0.230399	703837320	0.4093	796127399	0.199896
1038696117	0.267664	1085252476	0.351936	1376209948	0.122574	1152383291	0.252699	782215941	0.229829
1271165389	0.225023	866175950	0.152775	731212102	0.251307	1159937446	0.25158	1433596234	0.240549
1264787740	0.165132	1239131251	0.416033	800564983	0.542056	631557378	0.374008	671906657	0.281802
1523206070	0.144052	1403959282	0.164005	1187445542	0.566073	1006851815	0.543291	1118900874	0.238913
683373294	0.223764	1364171172	0.211348	824223719	0.38577	584775606	0.337541	1420773385	0.364225
758089874	0.465697	784442053	0.229322	758392184	0.354464	670873819	0.400247	961902208	0.270573
701303420	0.326817	647845340	0.137507	1652981176	0.231643	842620115	0.0489914	953856151	0.26574
1109171013	0.103876	597367757	0.0164384	1104848552	0.166372	1052942279	0.222773	643100111	0.488591
627703721	0.224387	813665392	0.387629	929192677	0.105793	819620706	0.224828	677770206	0.375648
730189055	0.106967	615540053	0.30489	1262280964	0.23481	699721567	0.484984	882185238	0.296427
691482012	0.23447	877481994	0.196185	1287624930	0.207105	1076326884	0.20238	1672080761	0.202814
1156596918	0.19834	457919249	0.408502	1115613540	0.164579	756983783	0.201101	745649190	0.174032
653532401	0.2299	315790086	0.4081	1180966845	0.179129	533799794	0.328865	901507032	0.29493
685322757	0.408583	1307189289	0.14692	868686527	0.185356	1459476819	0.122909	1169431481	0.308418
734821504	0.246762	986110807	0.234285	1082818471	0.240083	1500289398	0.356156	774642321	0.382031
979422798	0.310082	731850819	0.215913	977975876	0.225023	1432865493	0.380602	743989978	0.305769
619908289	0.311939	3327861635	0.165313	850157064	0.279988	513363568	0.318752	860282546	0.172602
602671279	0.232296	1212953009	0.28666	937969189	0.284484	656338498	0.330834	754058448	0.395598
703561157	0.504737	1080132895	0.193555	1382263052	0.188786	1377605612	0.270031	755925749	0.216264
649826938	0.199347	828040937	0.146346	741375015	0.319728	792656737	0.282694	702335984	0.234956
643377498	0.133874	698749273	0.283009	766279774	0.207075	423597701	0.118901	906298247	0.313884
733980540	0.178244	715793982	0.165886	972247706	0.208591	901849791	0.383571	990313738	0.261531
732023751	0.167962	749986068	0.231829	855954353	0.297677	734833756	0.466215	1298757245	0.637356
1023863077	0.196636	1714943088	0.177176	1162302026	0.182041	1120654663	0.23434	765032263	0.203163
1059516472	0.154068	669753150	0.532192	665901070	0.373223	567664746	0.4213	611029613	0.351879
839771428	0.169488	1332266754	0.211902	1263748285	0.227571	797205311	0.217283	784690482	0.238147
814547275	0.176321	851834780	0.104311	1077260692	0.106634	1550775683	0.227521	1018760430	0.175081
953341960	0.167671	760158499	0.226221	759381594	0.291511	1404711488	0.257654	777840752	0.370776
619175647	0.128337	939329321	0.202753	972642565	0.239042	1155942942	0.274121	2747263181	0.184361
1177379642	0.266004	926585344	0.209834	759872073	0.353021	1178961194	0.363415	1399857406	0.31902
1161904723	0.170523	1053222679	0.165775	1300488144	0.223438	903412781	0.19984	611431265	0.294396
818254744	0.246492	806467435	0.406755	1590441758	0.259235	1613748265	0.224984	971546231	0.308234
558796297	0.155769	896281545	0.361814	817201004	0.201951	754185142	0.511096	1110356230	0.449654
701527285	0.25962	894793552	0.16261	1126739436	0.21918	952458796	0.329163	987787339	0.203291
747954157	0.138466	740299509	0.216503	946574271	0.172842	856415461	0.419614	905621628	0.320486
1334441176	0.126899	603071538	0.333821	760367040	0.138816	1751138972	0.280275	802566958	0.291165
784425051	0.181667	610779090	0.244727	797258252	0.142551	972575984	0.272842	903719907	0.221891
587400016	0.206984	736125884	0.27409	836569797	0.157839	818778005	0.293744	802580905	0.354806
1078302118	0.120778	646761395	0.379508	1792280134	0.246483	1022888021	0.343332	1347640169	0.19446
1758378608	0.140856	1329741077	0.200383	1439435752	0.163182	1236229931	0.35158	800994590	0.0971771
1188254893	0.25012	637539007	0.17076	700305164	0.124399	685700312	0.319105	1659297137	0.274399
829124020	0.208787	911652699	0.251346	1216988164	0.125355	616427791	0.304247	1182803870	0.219235
653679471	0.356146	720338428	0.39235	1219608946	0.178899	1332563712	0.27697	1532580757	0.316814
1881764399	0.159739	660743957	0.439933	722821897	0.203056	1661683284	0.224508	739191771	0.188998
405809057	0.200191	759182967	0.199897	966926901	0.146229	672352391	0.308417	1117358041	0.189992
620347607	0.16063	628728253	0.235546	751044014	0.40522	644957257	0.277207	1050626191	0.223091
569369408	0.244291	1014222231	0.167211	633562211	0.144278	702858462	0.286921	1305124879	0.187202
625428433	0.384006	1425876604	0.220004	643379851	0.300394	1284800170	0.230643	889710931	0.206851
492487832	0.310215	663753606	0.421905	1271176564	0.207808	812518647	0.635658	933253243	0.207229
838944312	0.14567	1537285576	0.222	1557207543	0.200827	1107299685	0.185643	1390600156	0.245812
570987867	0.413871	748918587	0.377422	598409115	0.257614	1199232681	0.266276	918556125	0.3408
648680890	0.373284	692860677	0.230187	771688434	0.361132	1675948967	0.233788	1286581417	0.267948
575412578	0.224122	992736851	0.252943	1324991471	0.106087	631773974	0.218896	1453028875	0.282302
596116745	0.150775	1533546907	0.15429	810148333	0.333755	1386000305	0.26143	698955732	0.407403
555998799	0.542566	1307652956	0.246603	804901667	0.321877	846039194	0.191622	1187347500	0.207253
1242892617	0.243899	770895215	0.433102	1163234036	0.247475	1230772597	0.282537	1660339574	0.25732
665070935	0.166752	666937247	0.281601	1682182124	0.166179	688788871	0.558112	1632689550	0.188682
904675032	0.181426	1361046335	0.123029	709643941	0.293139	1304816828	0.222972	1202897744	0.195413
971190988	0.165332	1647397612	0.212899	797285541	0.224431	1340474361	0.206586	1198042261	0.233014
551482956	0.173432	818480741	0.276985	931534115	0.226876	657482215	0.620003	711752460	0.203991
677181369	0.2462	536001994	0.279159	674365080	0.333676	597569106	0.389302	726557461	0.370775
1286612912	0.152269	661638293	0.275821	876495047	0.258867	315788488	0.297287	933567917	0.194523
782393737	0.15442	679347391	0.240821	787124594	0.383864	343621601	0.283872	1141833714	0.166105
714186434	0.251389	1427593528	0.17791	1085342121	0.168307	1378001726	0.22115	708805333	0.342172
919692078	0.23726	1373188863	0.169546	1349595541	0.09745	1512969594	0.306087	911128525	0.353888
646411392	0.173115	802577985	0.369151	1360175571	0.148878	983113916	0.265891	1153280226	0.189087
1003459193	0.21221	1440097164	0.157691	1228433211	0.236544	1426814535	0.235644	1206765519	0.21595
1027565634	0.145465	659170104	0.485014	727998983	0.17034	539617467	0.312322	1095550967	0.166204
655037509	0.518136	707045058	0.507382	970001497	0.192529	1518465525	0.296892	646219398	0.206455
922659329	0.234477	679282592	0.128165	1430585275	0.145776	1331006842	0.357605	680887658	0.330205
511769463	0.164474	852611225	0.257387	846489450	0.311108	635349693	0.587126	873459269	0.236624
655956578	0.105966	1056436844	0.162948	698715120	0.264573	705374835	0.560193	701089033	0.243504
742457669	0.335377	759172789	0.258265	935786234	0.505928	636789630	0.359592	1450004591	0.226616
630886024	0.11988	686634712	0.445822	620328290	0.191763	1513753226	0.209347	711115566	0.340122
617290520	0.376054	944980694	0.159272	748344260	0.352564	823399634	0.187694	749246722	0.335584
855237756	0.154647	1067976325	0.12175	922737209	0.135392	1496377690	0.281936	676060812	0.291917
629652606	0.0944892	1116251819	0.120793	788140643	0.306287	742060866	0.242342	1253098698	0.490808
707617295	0.240388	764807125	0.231641	1112241548	0.186375	1570936489	0.181421	659492963	0.232958
655981977	0.208119	808004984	0.175038	842288730	0.261508	943623032	0.244623	1274935159	0.241084
720353405	0.212261	1358039195	0.139726	818751942	0.249211	733604440	0.25201	1351400294	0.240193
759986512	0.160449	664937155	0.178737	1157618608	0.156201	788415900	0.343777	1372783886	0.28699
1272823560	0.142909	426890942	0.13257	609117474	0.252006	1585415491	0.687784	588091892	0.30676
476388754	0.337641	618053951	0.118051	951511087	0.217653	776593416	0.374968	761880935	0.233019
592223038	0.246179	559590359	0.553765	876998829	0.16401	673420253	0.345602	778738231	0.286186
719137570	0.144385	598797309	0.281906	2488441941	0.298785	1431574722	0.210015	816458722	0.176172
1131682174	0.21692	612539082	0.231346	1812889657	0.165668	819502789	0.268786	1521118703	0.153823
1017120123	0.175101	1087702007	0.175806	708349957	0.516057	1237228811	0.221895	663246097	0.317183
852880902	0.176944	1446447913	0.217918	1613890043	0.145031	1233645800	0.188892	555212918	0.321659
781030537	0.113543	1054323348	0.229702	810252112	0.355281	1383520470	0.262337	713509431	0.122295
596054941	0.123829	1310447858	0.104346	1255614216	0.161159	712903369	0.349145	883203253	0.1875
510041606	0.178628	873223341	0.140129	760473611	0.168984	1187908645	0.183474	1139803170	0.270851
640001163	0.164786	940098465	0.331494	1000338895	0.18129	1456092696	0.58085	1101262858	0.334359
696744809	0.111962	1492965489	0.118213	779098355	0.158688	604628248	0.342059	726681312	0.194089
615250825	0.217864	854577600	0.362953	876530543	0.25432	720966967	0.259011	1291388034	0.228198
583850612	0.365446	617934158	0.2366	731304042	0.284666	1420980933	0.198957	713936967	0.332302
677968892	0.242585	681283435	0.206774	1315156492	0.165423	798929985	0.240682	1501828533	0.196624
710108026	0.16276	1581267031	0.193962	1312896771	0.205698	1068198172	0.276087	673533277	0.162779
625878168	0.2192	593038724	0.24484	1840115135	0.223356	734797425	0.412227	599109234	0.298699
1905212630	0.164261	1212924658	0.133396	1434946315	0.125121	615222570	0.424761	724873405	0.344828
608489465	0.367473	1077964326	0.18538	862301604	0.267982	778393598	0.18907	964728146	0.241017
687258676	0.139649	1376690974	0.167882	1328702049	0.215478	996087868	0.179388	1014327679	0.235
964508858	0.186214	673804034	0.385021	748563259	0.298345	1322621867	0.303875	1074907788	0.168977
1285142772	0.134591	705397940	0.308243	1099536102	0.181325	1111456662	0.232209	1209658162	0.15283
1344904073	0.165542	1078427972	0.148168	1483623980	0.241093	1146479923	0.238284	620397431	0.280502
1218381407	0.180325	649621639	0.366889	1688240974	0.132576	1328076195	0.115968	767949766	0.220809
584491946	0.214057	685495803	0.139346	757185778	0.0604396	882582253	0.211755	852478343	0.267063
1723252229	0.143753	909153894	0.199719	1812540300	0.145161	954817356	0.16439	1216114963	0.299725
621788152	0.290814	878419201	0.209613	1687907620	0.121877	755986637	0.194212	1001762950	0.191079
1559641601	0.171458	667756186	0.112256	1079836353	0.213202	737181899	0.266328	961762662	0.236345
977180370	0.195428	696739479	0.237564	797662412	0.235253	658058644	0.323102	1208883478	0.21752
589062861	0.199981	988395401	0.210569	1190340268	0.17705	707320022	0.256704	641166055	0.567421
1131877855	0.138084	943665653	0.1912	837761304	0.225349	1418253609	0.162511	844613103	0.498917
1107404701	0.141302	1033717127	0.22215	1072000656	0.143168	817573631	0.551161	1628382438	0.267867
739414247	0.435933	720676541	0.334234	828639793	0.191589	1812821012	0.559155	1008464427	0.395141
723250949	0.23161	1358764415	0.175943	1240422998	0.249528	1191150598	0.326761	711554011	0.304351
785086538	0.20204	1493660654	0.206757	1121708985	0.232328	1097601763	0.247274	604504987	0.342853
738919435	0.234759	1444048028	0.128266	773285942	0.333633	949986408	0.30472	769653291	0.265835
617137378	0.727539	710215056	0.270079	586790357	0.115015	1123215947	0.126637	770332007	0.365972
719793898	0.136907	652385857	0.285922	1252378641	0.240387	756544952	0.153766	635951400	0.402912
1450771044	0.149618	1062364417	0.18309	1136156271	0.310362	864762717	0.238878	1193464260	0.267161
603649647	0.459709	704269519	0.172959	630040636	0.18393	922392060	0.277832	774838315	0.216834
1136918164	0.196142	783929912	0.134959	1177240663	0.154062	1144660033	0.295461	667575266	0.242521
1191156886	0.344407	731612246	0.185381	1739298953	0.209377	590249637	0.470319	743314198	0.177792
986112226	0.153033	630192562	0.300008	1047587944	0.195014	688333873	0.259869	726434531	0.272298
803497399	0.230925	1089673815	0.175092	1232363346	0.193246	898295291	0.194409	660836114	0.281569
654615285	0.0816578	551513002	0.38659	823872698	0.21407	1450190393	0.189084	753898768	0.239525
1135268918	0.32235	996722597	0.131483	881812281	0.244479	2777240426	0.170912	1230207135	0.249113
1363759794	0.222183	956690383	0.137426	1074825172	0.147832	883129202	0.225279	778198398	0.257808
937911870	0.16085	765947492	0.131978	1499923242	0.169013	741136456	0.209851	1375873244	0.21072
665736250	0.184916	707412966	0.221819	772162183	0.283239	704607497	0.359437	630347559	0.153099
791984363	0.210416	628163335	0.251903	812241534	0.2573	857780885	0.261677	485881187	0.375076
1178417054	0.228949	629708898	0.225056	1397461014	0.285274	877354070	0.20329	1187929658	0.218657
640071652	0.220974	980613927	0.290752	871060872	0.135674	1310030821	0.286648	589785301	0.229544
862685482	0.151562	1228142297	0.281596	1663395468	0.231804	741046709	0.413998	826297500	0.197642
1081670106	0.146094	923966153	0.233634	754696522	0.155835	895883368	0.275276	1379098877	0.132082
764264962	0.182734	1116427748	0.23192	820162579	0.218295	1067466493	0.333256	1144780000	0.212173
655255269	0.163814	835539097	0.155579	785299791	0.176709	1620466910	0.2874	889955526	0.293093
1534019241	0.661065	1202092701	0.171015	793340170	0.424586	837258505	0.462967	1396962313	0.254541
702821863	0.24007	745419983	0.421971	989217977	0.189503	1601820930	0.424462	1306252296	0.198912
1071870691	0.150575	1107711057	0.0947631	810052615	0.157541	1417179890	0.136941	867649909	0.275872
739746174	0.251326	597528688	0.490286	614842327	0.304491	1399115813	0.248435	1146537265	0.237465
821173100	0.14817	1082887189	0.156944	1496283318	0.344487	226557196	0.23201	769449137	0.251744
1093836862	0.131131	1133518846	0.242069	1177934588	0.186305	1277928665	0.331566	1299413311	0.177742
1183731084	0.19448	965347640	0.140429	1430185658	0.454264	1119509377	0.182105	733048415	0.328399
940045998	0.212374	1118977020	0.136284	1118911626	0.1747	721151116	0.439534	1558611145	0.212949
485656850	0.114037	893087411	0.147737	1695940339	0.238455	3017811473	0.143333	681276371	0.516707
1411464458	0.147197	1410125088	0.216029	1467448304	0.133941	3395239957	0.135844	661150076	0.264347
724778877	0.167474	1281305799	0.160268	1471614912	0.200791	1151712192	0.11503	623857854	0.152907
615792261	0.282012	667977992	0.103714	1433077429	0.174088	620458426	0.491262	617930435	0.548663
684769360	0.366313	752440865	0.215623	1496262803	0.151534	1835953305	0.144152	599596791	0.259426
754111760	0.233975	1235242654	0.18856	973247178	0.215533	1495438011	0.3877	637289466	0.355099
729876266	0.175993	606630252	0.407289	1462054336	0.149376	583079496	0.23726	903389980	0.270009
1391002438	0.17747	785561557	0.16349	1166469346	0.242698	653814410	0.292088	1171360091	0.222047
629266092	0.377308	743212627	0.161232	874502210	0.109529	2052696077	0.338546	1183989072	0.257897
978038437	0.179205	691072738	0.417341	765251930	0.231403	759769544	0.132491	1202771635	0.174267
618966633	0.23458	619307250	0.185153	1208417116	0.131803	854936673	0.273506	1230583663	0.189054
519394026	0.18432	1411574067	0.201908	954144393	0.29745	626577534	0.22057	1349836565	0.353756
548702548	0.178891	612145111	0.345706	996291748	0.350627	761119312	0.387269	1262496051	0.279298
706905536	0.21356	664274640	0.131659	931266741	0.206424	644201030	0.496248	787961467	0.172868
506133055	0.158577	818840413	0.209799	1093946997	0.1572	672260999	0.419333	855950666	0.321968
563687006	0.436284	705879641	0.258046	744767544	0.160371	1723578337	0.253913	767557894	0.230897
551608888	0.132776	610817689	0.189113	1549211324	0.227862	1149605563	0.305491	1736303161	0.247726
853035186	0.14731	646015730	0.141738	893222235	0.283726	1340677812	0.213799	879195290	0.256527
524713616	0.159772	625947028	0.237453	1376054666	0.215064	753449747	0.225849	1296489190	0.325846
763410892	0.346911	1348677673	0.172213	912040744	0.21293	673966327	0.183017	1332666546	0.322555
654766772	0.0785458	953767602	0.19156	794160985	0.435578	1090586935	0.178328	1177883551	0.290781
1109845873	0.214407	1480779224	0.14608	901369824	0.238658	601704386	0.356496	1413364247	0.294142
873531844	0.265604	967682034	0.219628	1117276437	0.20665	788920278	0.288427	851992225	0.327477
677212004	0.112639	970333372	0.257328	722996409	0.299526	670253200	0.194722	748422388	0.426568
1410882531	0.34386	674086078	0.259733	1456884914	0.316984	823379999	0.364978	699681168	0.411076
1259236210	0.210285	1133774870	0.228707	858881988	0.200364	627853656	0.500949	1556792261	0.414411
723762606	0.122493	570705634	0.44544	1146907183	0.266608	687160423	0.366057	793934032	0.250467
656696859	0.169351	776220869	0.241192	1489487274	0.18195	715753482	0.408322	794601786	0.338518
740462123	0.177762	688836703	0.199853	1242279681	0.134174	1169147693	0.162272	1430526075	0.216748
819353901	0.156295	773358907	0.232298	606499572	0.282667	1140612948	0.229215	732990136	0.307993
604718037	0.232266	504760334	0.247276	619957635	1.33412	1406921458	0.240762	787167572	0.57329
880972406	0.0808081	1581526943	0.407245	1733329745	0.254813	778265699	0.202908	938995819	0.293781
1499911710	0.200088	1075168899	0.125571	682983417	0.23528	1151957882	0.262129	742330234	0.59473
499920211	0.176935	942155018	0.119701	790346554	0.118554	1008089749	0.221949	756322207	0.20831
740600338	0.203767	947845807	0.0861619	849351277	0.138662	821933701	0.12903	700758330	0.195153
485765072	0.18984	1075080791	0.157691	760376230	0.409655	1338801011	0.204598	1463122282	0.230369
990786354	0.152327	724306316	0.214714	720185225	0.477009	1324763846	0.173672	919629803	0.342761
935271040	0.170431	947978394	0.247992	945943633	0.47905	741929693	0.317768	754922825	0.384349
601717215	0.289227	1510651042	0.116384	586290773	0.321315	841840496	0.233963	1177264305	0.195203
761640364	0.250322	697636160	0.334656	1331513325	0.204477	1383440541	0.318972	879536208	0.220052
580746038	0.281005	949068241	0.151606	1364255543	0.221183	795093534	0.408488	1323410332	0.266185
776665698	0.147627	787530913	0.192421	1007374201	0.157944	1062410888	0.229294	608754667	0.36565
814128482	0.291714	1062068218	0.147944	636244728	0.526633	810689394	0.250138	853878303	0.35676
691980420	0.248162	1581514948	0.279548	611817488	0.312517	257366303	0.367891	1378519018	0.219646
811068910	0.178846	565609682	0.252675	669635215	0.266882	176661605	0.374272	751925099	0.260139
685777627	0.271313	600426960	0.472993	1118601077	0.128785	850075786	0.128219	1455032569	0.199198
753103926	0.361677	1493760149	0.222688	806808437	0.121349	2012207309	0.515231	680244328	0.411554
777953588	0.277656	1299505159	0.223972	2290768738	0.466133	1378955240	0.194653	1983079050	0.259814
662534275	0.355014	1102592306	0.118634	828002394	0.364993	632738436	0.548012	715301710	0.218589
582582573	0.395266	961150084	0.242137	609180741	0.316182	550309319	0.451348	1012122068	0.311883
1148259229	0.490667	720461667	0.110964	864302892	0.13829	758045966	0.35976	770249511	0.455004
906928474	0.193555	647395254	0.157722	747944880	0.216494	595153001	0.325687	1177457887	0.221233
655942851	0.266435	1089501507	0.17281	1265547937	0.123414	874621394	0.335913	1118033054	0.168123
678592203	0.121273	675235428	0.466317	779863154	0.360747	796226076	0.208865	756265722	0.361267
714731706	0.38573	729067977	0.278968	824062759	0.30538	1430461228	0.246164	688812209	0.355346
1422246353	0.140162	1313888769	0.125562	727274841	0.153088			886035498	0.225486
700745411	0.403668	739039984	0.118878	971926081	0.104132			1206656908	0.246924
675463934	0.396442	707671802	0.212343	1752760135	0.246035			1323034667	0.210687
923740463	0.149438	763661384	0.278816	1347130066	0.17278			903179680	0.297788
704867016	0.377219	754532070	0.362588	547335168	0.331747			831733298	0.281658
739387007	0.250012	570246298	0.252005	986387725	0.209803			1172091785	0.239416
703521819	0.146106	869511744	0.144022	776337350	0.218292			1163736084	0.144383
755841232	0.15852	747228990	0.386512	708661657	0.180946			720466839	0.322228
915488284	0.254682	669995827	0.337786	1516186975	0.188677			1081387358	0.224819
662908778	0.181818	758958870	0.194051	906642116	0.228155			688028874	0.208862
643421565	0.20177	627179838	0.105182	625760217	0.280483			1392488455	0.175521
1087392329	0.457064	600902363	0.272962	678755211	0.285923			749790901	0.408868
730218685	0.303428	1243104098	0.209369	774976104	0.299152			984237278	0.18862
681915986	0.156807	1021273335	0.181033	752208308	0.247523			845093316	0.248521
1165602185	0.244224	1145953481	0.32125	853589439	0.313985			1315163687	0.203654
642757707	0.386841	747380954	0.214959	1667519016	0.288783			827971452	0.196021
587569989	0.14819	917726123	0.13644	1293172531	0.195313			504687093	0.384734
914005879	0.11708	699107565	0.233215	1158637074	0.225105			1437947025	0.257525
757135837	0.171282	769852423	0.185577	1359432862	0.183111			642295018	0.276875
801768728	0.224027	444499217	0.130786	1282959775	0.192			1233144440	0.209063
849096469	0.169761	1398788011	0.148589	1193989754	0.135673			605302068	0.369335
1117027187	0.124054	605233216	0.333384	763508687	0.141193			881812441	0.485168
986094477	0.188168	610826718	0.255556	1377718201	0.169707			1127201209	0.707668
643783886	0.211126	837874290	0.147626	865314061	0.194241			667260329	0.461779
1288862185	0.117322	716647649	0.135593	1555184846	0.149045			671988315	0.287109
784025543	0.182777	640634042	0.393165	1358492599	0.225984			754814924	0.280916
582899026	0.359925	1080561214	0.154588	1004809778	0.190698			886803158	0.246501
645730010	0.137399	689898915	0.484161	1064174732	0.203511			802698189	0.195144
836670718	0.138851	914658374	0.174159	889597793	0.24091			853990093	0.223884
618896201	0.154942	528353006	0.204672	1496450831	0.295153			618770932	0.199259
544376540	0.38943	1334341491	0.29139	917098500	0.340032			795941161	0.396836
1085894525	0.159499	605492980	0.226341	756499451	0.282083			695880653	0.246054
1340712290	0.231602	583059913	0.225609	444129283	0.461065			701824029	0.193417
734413008	0.515812	1025052825	0.169772	858015340	0.398307			713911829	0.394257
1547118306	0.147751	1299656061	0.304564	899534860	0.295586			804719544	0.236393
737633170	0.433627	921180777	0.166564	1264010639	0.196254			962909693	0.330947
610580946	0.405212	913868352	0.187934	885838330	0.261853			712371842	0.303227
1046145156	0.210516	675321150	0.15732	1538291381	0.179201			1447775764	0.351984
654776346	0.310319	1024317609	0.117323	1568140834	0.211682			766775281	0.11555
683858176	0.18695	683476116	0.230985	984277598	0.215943			193891484	0.229326
581846649	0.110696	588380770	0.326191	846582905	0.241089			548867009	0.276115
2205943409	0.273264	518310490	0.401785	1863998605	0.182656			852262379	0.577113
940297170	0.14421	593318276	0.129875	1787802488	0.329418			1066766150	0.257729
1699622162	0.354859	1420276496	0.18264	961530509	0.23061			1220468109	0.248762
838066288	0.156283	803827989	0.24333	754203414	0.248447			789782766	0.408804
1163789748	0.132005	1343412133	0.220643	665329682	0.562373			988266592	0.255908
591565711	0.755975	718956183	0.242297	781823987	0.196289			828855125	0.419671
706508350	0.467359	1019258504	0.198509	1524071561	0.188851			721862003	0.216213
635555521	0.463424	594535689	0.246155	1209741030	0.134772			840545797	0.242414
317320625	0.408275	1372302586	0.274516	912060069	0.146371			762630738	0.186325
167945613	0.428042	823186811	0.596979	781802595	0.304671			555675205	0.520565
1262298562	0.427313	1431035100	0.11415	901396029	0.422652			740862777	0.434459
888855867	0.168823	950030961	0.323675	890162562	0.526865			1243048748	0.187546
662136592	0.200123	1326719469	0.128554	841614254	0.373598			690167543	0.554021
648749219	0.355449	754064372	0.375275	953932528	0.339225			824184300	0.260411
613774753	0.305743	698177057	0.303816	1096939515	0.191461			886398520	0.578837
1449806486	0.0981137	733767320	0.253707	1708148947	0.202897			950221958	0.521085
656666444	0.345396	905566189	0.185684	898698210	0.13624			956033760	0.524731
756655057	0.210216	813125836	0.178699	1436009684	0.143492			1427837385	0.286738
1462580471	0.145725	809868025	0.184665	813744100	0.497583			1770368527	0.385945
993051596	0.177072	1047005142	0.160086	910859440	0.164938			1581966373	0.351566
1275181726	0.22009	618667252	0.529558	1112039605	0.239057			1555264845	0.157737
675167005	0.363902	1019959949	0.174131	985155025	0.212377			1646314070	0.421516
557760899	0.354043	731568765	0.264782	963598382	0.177398			758889318	0.21814
648369390	0.217443	751603316	0.533645	927129095	0.164941			831851864	0.135704
596046991	0.111171	754533735	0.200419	1307375911	0.274424			952493131	0.306318
603305818	0.475857	688081993	0.332361	807027006	0.195834			1062772916	0.363648
696420786	0.457139	643419319	0.249528	672023029	0.255003			604095883	0.419141
482661954	0.286817	770745084	0.270272	89522144	0.272644			1478738069	0.286329
913119533	0.148798	719693413	0.43953	891141466	0.259179			810536499	0.30382
1118211262	0.253636	971315912	0.259027	886267197	0.180717			780905091	0.308869
613517433	0.28537	847402333	0.273034	907914565	0.184365			1654156644	0.291039
692788596	0.115724	1254725564	0.146681	1989539553	0.178403			661375625	0.22866
903831482	0.180971	756234759	0.221449	1046491384	0.132069			769646144	0.272236
1333564772	0.117706	867802781	0.182946	779304501	0.197051			743914061	0.241584
741045263	0.308481	1452840346	0.387408	901557897	0.332694			714541073	0.155158
979811686	0.118195	976836491	0.18089	781082686	0.365632			578556009	0.418451
1187417765	0.119562	657747399	0.661496	824519729	0.253277			1295170440	0.296635
1211331957	0.1598	713405137	0.590037	1005974163	0.183622			1506816843	0.316183
669625005	0.297606	1180932587	0.258203					1232176474	0.257668
676365650	0.387313	601309777	0.351107					603726203	0.287484
625498704	0.308808	624175424	0.153796					1321520369	0.260383
615460195	0.310671	805878565	0.281366					1242831322	0.18465
647281340	0.273584	800534151	0.145233					976125271	0.239535
1098924580	0.176134	709813683	0.254449					1359455125	0.354652
793131055	0.341069	909019113	0.223951					729112610	0.256432
492424282	0.167775	1167979700	0.215239					600845192	0.245537
560438240	0.283513	543738017	0.286823					726124251	0.287951
941094758	0.166737	912492837	0.25678					815646717	0.182247
590351968	0.34503	710972562	0.203856					689164515	0.277558
558487023	0.485129	684248412	0.34369					711288488	0.368643
1105210543	0.170391	691221036	0.209878					1474227842	0.173524
1040017573	0.14764	574595643	0.269079					1062452197	0.233328
699150682	0.248128	1430592166	0.247591					1220016770	0.690364
697130886	0.0990199	1036974564	0.321506					1043577154	0.300965
1003558061	0.120401	259387305	0.307476					1459433704	0.144407
1279823921	0.165123	1222087511	0.231562					616661892	0.633233
1354433554	0.2242	996582752	0.282557					1397463993	0.328805
1054006845	0.186632	1269215091	0.159646					757354725	0.559304
768017033	0.254171	922923108	0.235274					1667249063	0.243863
650254954	0.208298	1231181152	0.180567					1205496647	0.233926
606274200	0.151161	737328405	0.288183					1019847134	0.32679
751049121	0.216023	675848380	0.248406					772427119	0.292803
1299829403	0.320355	878426460	0.164213					1221514413	0.222278
1691831409	0.688346	1072115625	0.239208					1026924101	0.202713
1004316406	0.225843	2334605728	0.227355					582840528	0.274707
1383294070	0.239843	1643801424	0.315712					1107406237	0.211829
620573045	0.327215	1272625186	0.176645					1214882647	0.311294
969406157	0.211117	1650321210	0.146237					1397244831	0.224423
629938065	0.365324	1636579816	0.146014					709895231	0.518152
592299438	0.21796	1249638966	0.156977					614040226	0.452506
1285764995	0.220576	950951109	0.213061					1374195358	0.210819
941060465	0.183021	598361553	0.233214					1138614297	0.195536
842860208	0.138593	885358579	0.310273					772831518	0.313488
635698847	0.205358	682545077	0.238444					1143520721	0.263972
1223456328	0.498224	998449903	0.223155					633134803	0.24327
1372846779	0.238037	526673384	0.516682					695236549	0.460841
1048479849	0.490282	1012693778	0.306876					713818701	0.358692
568339363	0.323444	672339549	0.26627					712952273	0.326278
1160913544	0.189073	624029686	0.313152					623925174	0.204978
750957541	0.368618	1524532957	0.20589					1002212881	0.303886
725029707	0.152094	778913971	0.154143					885193562	0.339175
597767451	0.289167	672999931	0.198786					960718297	0.224126
1304217454	0.125564	948608086	0.153978					1164145533	0.263124
1221664466	0.130756	1405456440	0.213881					1668008342	0.268325
868130911	0.202963	621295257	0.28981					1260037497	0.365299
1037995324	0.327832	725511870	0.223412					1408282170	0.193487
1527027528	0.174239	836178321	0.148272					680083006	0.43499
593444026	0.313311	922735475	0.181654					772995203	0.56445
654231928	0.154841	1472209280	0.219428					778626594	0.263803
965435541	0.12948	731055886	0.388526					1117567066	0.211779
707813155	0.141114	1559761479	0.206901					812132034	0.588541
618519424	0.266435	616481103	0.281867					723594387	0.321811
664260601	0.264488	1187639774	0.274742					1326240351	0.257517
1389048931	0.107908	1163321555	0.2329					884787322	0.165603
1155616517	0.122758	1132434772	0.173609					1304646794	0.281831
1332901577	0.232905	1333148650	0.256997					1125640271	0.129089
595816034	0.301006	725069078	0.176195					833061268	0.224719
607404621	0.436456	862184010	0.160029					1610172033	0.19777
565499039	0.412852	674453369	0.260271					976758913	0.199768
1523067111	0.277107	1226495420	0.235701					1526079846	0.20322
808725487	0.326191	1139585996	0.23576					989195584	0.476696
1306344339	0.199083	1093933190	0.206907					975235464	0.51199
577749993	0.217757	565387322	0.163617					798579440	0.185245
1291066478	0.151376	667978282	0.493712					1711367265	0.242177
805537260	0.211964	871441283	0.150939					807232905	0.262001
1330557818	0.286999	1124454000	0.417559					840162723	0.271601
631098676	0.415251	682978076	0.24658					933443732	0.376865
1211863619	0.163677	1050496412	0.172177					845785409	0.259792
887867998	0.165802	590337583	0.297382					941444155	0.0759801
677445257	0.209743	1238864457	0.166813					1864201386	0.181558
976172423	0.141776	726292821	0.349581					886405495	0.373916
1439537670	0.126473	496613296	0.533521					1619251984	0.146835
640632710	0.198349	757986952	0.303186					1171860553	0.199014
643041397	0.448112	855105824	0.1815					767278951	0.489633
735743481	0.310262	980535385	0.259928					1805124938	0.237313
480277477	0.203674	636358472	0.235024					1281538432	0.233134
506731356	0.275753	698720698	0.111227					1592809189	0.196959
668820566	0.437969	986730657	0.198898					733494823	0.375933
617248481	0.347164	932279169	0.238051					753782464	0.216951
587027215	0.114898	676434040	0.260434					827269537	0.389633
1226498019	0.128019	803326579	0.21205					1128882497	0.222475
1081121290	0.20788	876171799	0.146636					691760562	0.361284
1280256855	0.144751	873346020	0.152661					1427770226	0.271872
1066705861	0.157857	712612075	0.243416					967081684	0.318182
1111252723	0.313041	670725718	0.315919					1295679560	0.273784
643358327	0.255766	1509012861	0.171745					1476236940	0.302898
515258415	0.496507	771790052	0.244495					980385491	0.384231
561077676	0.499369	915826033	0.210409					837693883	0.218774
523327220	0.261893	752139024	0.261472					1690118324	0.321299
660941500	0.212057	456188022	0.225235					816084314	0.303489
602065736	0.331636	815721779	0.126027					653188357	0.258772
1530293409	0.225179	666113542	0.325469					1556536039	0.189298
1582749102	0.190482	1158051977	0.203822					733050833	0.186225
642154417	0.144898	619437087	0.217592					691006917	0.501339
672612815	0.277502	550340095	0.347039					717879943	0.213741
555598365	0.0323529	583542090	0.460932					702842779	0.358086
1279088695	0.111257	660292680	0.339305					1582357941	0.256848
701149368	0.147446	816931630	0.150313					877245768	0.35142
495706093	0.312672	846676673	0.123982					1466539304	0.159413
1100767454	0.338592	1353618261	0.144685					1927432771	0.251032
1328795484	0.150694	693014356	0.534719					1092808471	0.301833
646633518	0.232478	1295873436	0.194875					638716257	0.208007
743804054	0.187358	1083418530	0.387902					699193775	0.254902
641999441	0.455697	704100403	0.313416					847509932	0.341602
796341148	0.228146	651447796	0.198942					852234567	0.139789
489478404	0.424272	722390391	0.554373					1020112333	0.36063
949474697	0.114569	679034811	0.190918					1306149891	0.241582
652416195	0.356079	927714348	0.183889					1280257458	0.264494
668266307	0.272601	1090463829	0.181591					938830547	0.351391
644290360	0.162394	594533807	0.27709					1644005322	0.221744
991119269	0.167135	746592107	0.189602					724850067	0.457182
989477852	0.163045	995608911	0.0519126					1003201315	0.197471
1239335865	0.159029	744653545	0.382726					885533631	0.152913
798191926	0.129336	1199286427	0.286254					734853746	0.29137
539183096	0.234438	569891584	0.192048					1959173842	0.283242
2456650532	0.153858	1004392943	0.116441					2008313475	0.35706
1099210975	0.768675	802110357	0.239364					1350539136	0.187537
968157750	0.748385	703641217	0.362241					1311013784	0.211261
904096823	0.218646	703973517	0.216268					765928783	0.247688
793551137	0.230877	699672034	0.358943					711165719	0.26703
1391663531	0.229308	547983013	0.350993					650739970	0.284169
1378116213	0.18687	686754012	0.274844					1437405750	0.279917
699459563	0.156474	638677027	0.761352					847986599	0.250488
1150248431	0.170691	785232007	0.262599					2562444216	0.250293
755283393	0.168907	764914243	0.154672					1171888647	0.188137
614956222	0.488565	703210698	0.22204					1158252724	0.171774
1287816041	0.149502	1447674426	0.212569					1167651805	0.365261
552946148	0.437243	748491164	0.163669					960860022	0.487491
705877780	0.186655	865714436	0.23274					1782324421	0.187603
698629145	0.231447	1031651747	0.199661					463209630	0.388758
657672714	0.162514	900695179	0.219596					668020857	0.421842
659296311	0.2719	432637135	0.194572					1608645528	0.203991
1869747809	0.141659	1216857844	0.146147					772200377	0.321975
597756463	0.20471	640184363	0.187527					659789767	0.2933
555836927	0.455025	838535280	0.368254					715835747	0.424415
608699399	0.622824	1241511756	0.261214					1063631245	0.210604
624162262	0.379839	670052651	0.43863					1405428968	0.380585
628575256	0.193453	694918309	0.405522					574585288	0.254877
766088567	0.192411	693539083	0.274861					623281004	0.183288
1163279447	0.133548	1056508219	0.195431					1172208690	0.275523
758465414	0.133611	677945439	0.313296					641086883	0.292318
1260142217	0.126823	794090851	0.344106					1046519035	0.229815
1111227198	0.239598	627756947	0.308483					1121072559	0.31019
630429273	0.126486	942940759	0.202232					1595024156	0.20321
759013993	0.164198	1505474646	0.170403					740042032	0.259638
608690776	0.145311	1205156162	0.191446					675501707	0.491075
682610456	0.2139	737529397	0.217181					1205480457	0.243143
611497605	0.14381	1149761939	0.256803					1091129266	0.183266
1005796554	0.234557	729306213	0.194987					973528887	0.224708
743497362	0.1782	880868194	0.294147					841670374	0.349155
626343522	0.605972	1221616878	0.146803					825866766	0.265662
668869577	0.454996	683841874	0.230645					974677783	0.282
1276249573	0.222667	556076715	0.240894					806059754	0.342138
547111129	0.136721	1284534230	0.297196					767434590	0.328493
620980443	0.463889	675380906	0.298418					629853090	0.127244
543779438	0.447652	615938320	0.275587					761808803	0.322661
594944961	0.386957	676684447	0.380141					1062133240	0.24361
632060518	0.170211	1502534871	0.204884					955650996	0.162122
1249839935	0.193603	876282096	0.254079					1386753295	0.385267
552742680	0.149588	1271370997	0.216084					714357665	0.465728
732844130	0.613579	648452931	0.30829					1616542087	0.46646
680759537	0.259417	656120609	0.164169					809958064	0.199446
711892269	0.260631	717737793	0.287997					745519007	0.341147
766545875	0.245284	636325532	0.31417					656042498	0.531314
575877213	0.276424	595621412	0.435187					822244045	0.569762
544656814	0.129364	1666541335	0.188955					1590273396	0.414982
761427559	0.169117	1305431643	0.300474					1488758145	0.380893
1229980083	0.14652	738622219	0.189171					1479358583	0.256905
540882738	0.214799	997942006	0.179508					1735431325	0.256692
506910412	0.275443	731586377	0.162964					1370781237	0.298718
868034272	0.195223	651381902	0.266804					501831548	0.484019
1113994256	0.179492	1276901164	0.220726					605956487	0.233742
806032926	0.178542	781674942	0.187428					1685937334	0.597976
657923904	0.940416	1046442638	0.305232					606172862	0.325303
773112358	0.133768	944032582	0.208586					863830546	0.22947
801462681	0.113957	1407722455	0.155771					772741206	0.303735
1839549844	0.149729	1209142955	0.231366					1297230746	0.200174
1460294998	0.149585	1039021002	0.182934					740746007	0.377678
620977536	0.247423	922993658	0.297866					1777400941	0.191263
1194328043	0.1748	757806695	0.240736					1611719152	0.238292
811523890	0.147332	747050823	0.380083					663604110	0.271218
1009300586	0.135736	951114793	0.150515					860116064	0.209965
1372935847	0.169456	554046798	0.337356					746434469	0.271538
604428834	0.336318	627813843	0.277541					1131469822	0.299449
951394549	0.289366	797153864	0.217056					1428287518	0.275239
1220959525	0.199585	967746219	0.155322					1598858926	0.271716
1000362425	0.154625	1296825602	0.223439					1104989566	0.299829
		958819800	0.160324					778058423	0.288198
		768726414	0.199229					707854758	0.274238
		753430918	0.432032					689770228	0.341543
		1882138635	0.193689					684662474	0.301394
		643740590	0.196155					1580105564	0.311024
		1573368323	0.192586					961462047	0.337933
		758584407	0.350385					754775989	0.512052
		795204710	0.188056					892508560	0.218123
		695390194	0.354387					1052214637	0.275533
		649774472	0.285595					1622528459	0.374576
		807450794	0.16202					1728514231	0.296534
		2149922189	0.480476					1501862966	0.285323
		1450621029	0.208148					1572069038	0.262336
		703853176	0.160722					1671371311	0.333573
		621309430	0.189887					848791714	0.467526
		1273775292	0.21974					723938080	0.284962
		754412250	0.203465					769469425	0.208746
		626128586	0.307147					685730600	0.262479
		944952088	0.174011					1817190691	0.37096
		1179143232	0.141458					1142029891	0.250682
		1368967699	0.144908					1479609744	0.199421
		302123395	0.242068					656414351	0.33832
		1192136357	0.138685					803015317	0.363254
		852986583	0.225415					679306342	0.432742
		1145138124	0.206073					761948524	0.476265
		1116052315	0.304738					1395507054	0.275417
		623451544	0.307826					603384477	0.40288
		683007339	0.201622					802118595	0.200128
		792705712	0.234477					827752213	0.272886
		748707215	0.221299					840019858	0.286477
		806035781	0.232745					694747488	0.157431
		648541598	0.351524					919968856	0.231097
		857291165	0.154632					869784374	0.182592
		549758730	0.36724					884608138	0.155472
		640780418	0.348564					897223011	0.240922
		852091517	0.287155					1538770460	0.337826
		566204260	0.243032					929873104	0.232923
		749930577	0.322859					592560424	0.176906
		606568943	0.364189					1418941851	0.231735
		1085751873	0.140027					1153824499	0.381301
		1026956581	0.238458					1019432373	0.343062
		1245992862	0.230137					1201909439	0.222617
		857374846	0.217859					939689262	0.266231
		639317186	0.418066					1573915270	0.193674
		1123029517	0.255159					1564830597	0.228265
		673795146	0.250937					1216789589	0.201868
		580494585	0.236102					798853431	0.411053
		749954053	0.242576					2729456527	0.378006
		1363880814	0.198311					1282033612	0.293175
		1537838717	0.144748					1541008188	0.215306
		848800520	0.255914					1229155951	0.232804
		1606154437	0.175426					838823606	0.26013
		594860560	0.259833					1968528008	0.355538
		575223368	0.205349					1181235362	0.374527
		805797829	0.181331					632637675	0.198937
		1037744948	0.158368					812988440	0.189177
		1127365724	0.155143					845210950	0.244921
		744307340	0.196137					694426042	0.255565
		1125801578	0.197188					808909968	0.232053
		740093928	0.2428					1628666999	0.235642
		697636167	0.0742358					951928035	0.230604
		1177153101	0.244056					927594743	0.298009
		863475368	0.0228873					1785510686	0.225621
		615480658	0.179218					882427739	0.253021
		631375183	0.130961					998746597	0.217252
		803928517	0.216389					1427084927	0.162158
		1378155915	0.128766					885396950	0.285368
		914261145	0.0463918					835693959	0.483019
		682820003	0.15344					1627448716	0.223539
		1282183375	0.197807					1449179375	0.211069
		902594945	0.139551					695797785	0.348133
		892732322	0.183944					1064250939	0.238769
		659937208	0.418628					792446767	0.276308
		1076336108	0.148327					692615876	0.63595
		690643068	0.176622					867945233	0.149195
		894215153	0.245143					1004727667	0.24937
		798473521	0.156891					1107492144	0.244397
		1066914200	0.194949					847989874	0.244883
		728893615	0.369882					728515284	0.184731
		695914462	0.203532					1248481937	0.219323
		1516614847	0.215906					836884131	0.344221
		684738064	0.269925					844258341	0.296479
		1645418376	0.258388					820393509	0.223521
		948899339	0.188238					682830294	0.368345
		736378747	0.244322					858011768	0.445145
		667688906	0.244481					768419034	0.377154
		884013729	0.206904					1371998526	0.199332
		1225911595	0.12677					1643693814	0.165507
		611223923	0.361964					1103831531	0.250076
		712953702	0.210721					1214920804	0.210067
		686662470	0.205482					1145399663	0.224829
		1303697018	0.28479					1073926945	0.205827
		1299484330	0.320868					933533710	0.131989
		760424594	0.131704					1429575946	0.24068
		1325126732	0.326017					862541207	0.360557
		1460954892	0.329123
		989236462	0.128661
		742021371	0.208807
		1284456195	0.150041
		786336162	0.152226
		1013827595	0.224992
		814809229	0.285569
		614243511	0.139725
		648508391	0.153377
		684904919	0.275588
		806416167	0.243177
		845066251	0.282188
		544010427	0.188612
		1238295780	0.494136
		1695288901	0.18082
		1072970000	0.159805
		1244662136	0.479854
		670551861	0.330674
		865809669	0.249327
		464408449	0.193998
		715840689	0.224849
		940668677	0.181596
		1301993001	0.147083
		688688866	0.318314
		802766860	0.2122
		680999095	0.309081
		2487615707	0.145329
		659302270	0.274611
		1756659021	0.161928
		742557266	0.22692
		798113919	0.181792
		779499126	0.195011
		690090616	0.427849
		800148631	0.200925
		1384889904	0.200527
		757963245	0.120963
		1490222253	0.214063
		762867427	0.183329
		763256833	0.28859
		2045962560	0.206063
		738924659	0.243924
		1392407382	0.392368
		1403563365	0.127901
		677873883	0.366275
		977642670	0.232405
		1038431953	0.205734
		958415507	0.174669
		727846190	0.217044
		1494295827	0.108293
		1051639104	0.180287
		851158223	0.367183
		773477183	0.188632
		1570753704	0.235256
		1142473878	0.199257
		733138481	0.321327
		868937563	0.320297
		864097334	0.190916
		823037781	0.345843
		1196478880	0.134252
		890308795	0.264296
		989315012	0.164334
		1065170611	0.240029
		645241773	0.173167
		782308532	0.230629
		755429554	0.240542
		798010899	0.326466
		1834213306	0.179346
		754502113	0.280824
		1166517463	0.115479
		978538382	0.180409
		873301073	0.17689
		894623381	0.155129
		759230001	0.179954
		1397717368	0.139996
		861444434	0.178358
		1137384961	0.162776
		607014239	0.29803
		1113682681	0.17038
		1777975646	0.178129
		755572880	0.13854
		1101378577	0.127819
		680593157	0.176125
		968646112	0.29692
		1519916686	0.183147
		560646323	0.490753
		1378533100	0.229813
		737129717	0.292582
		768084898	0.164099
		725794675	0.174498
		1196507318	0.304642
		643884794	0.319326
		528924981	0.359584
		1230459023	0.373109
		800888055	0.215886
		842547300	0.223242
		702904033	0.437644
		965064420	0.213884
		748747059	0.215149
		1562656235	0.247868
		668123417	0.42748
		609137589	0.148189
		835890874	0.249689
		953537351	0.249524
		1341292709	0.241131
		718687674	0.410493
		568450416	0.338909
		893974039	0.2357
		469691390	0.295226
		1419987099	0.170152
		672605534	0.219463
		867373312	0.260183
		572598176	0.427402
		825442007	0.191696
		643201157	0.314212
		819807997	0.185025
		765756425	0.170006
		661149907	0.273593
		612493673	0.340013
		970770742	0.380739
		1100664853	0.210462
		1166337650	0.201955
		929462736	0.134293
		1211347544	0.162074
		671696882	0.23707
		511715812	0.277128
		603740769	0.280968
		669140598	0.214919
		625651773	0.242597
		560515575	0.293341
		686984023	0.209346
		744727886	0.151726
		562427574	0.167635
		712138374	0.108041
		783682250	0.187393
		954350021	0.2552
		674352286	0.165219
		706134982	0.326031
		976301088	0.138216
		653614906	0.282244
		748726418	0.141728
		728612329	0.137983
		1352320789	0.190327
		786005197	0.179598
		557789719	0.353973
		688120142	0.548037
		1411061118	0.22824
		639038792	0.283953
