# Supplementary material for: LAP2alpha maintains a mobile and low assembly state of A-type lamins in the nuclear interior
Source: eLife. 2021 Feb 19;10:e63476. doi: 10.7554/eLife.63476 (PMC7939549; doi:10.7554/eLife.63476)
Supplement: Figure 4—source data 1. [file elife-63476-fig4-data1.xlsx]

## Sheet: Sheet1
Immobile mEos3.2-lamin A/C fraction in the nucleoplasm of WT and LAP2alpha KO cells as determined by constant photobleaching
mEos3.2-Lmna WT	LAP2alpha KO sg1
0.291621	0.367161	Mean
0.156276	0.134222	Standard deviation
0.444547	0.0372136
0.540823	0.250926
0.156951	0.167563
0.124022	0.282845
0.24345	0.464783
0.0719405	0.571067
1.4493e-07	0.462414
0.195769	0.626423
0.462006	0.332294
0.254164	0.397875
3.02895e-11	0.449276
0.346319	0.358985
1.62877e-06	0.48287
3.53725e-08	0.422114
0.0862635	0.4809
0.149096	0.522949
0.405793	0.374606
0.34949	0.395822
0.216068	0.449297
0.375486	0.422335
9.91051e-08	0.494919
0.441271	0.364917
0.377607	0.351997
0.438356	0.301115
0.306871	0.37015
0.461101	0.350046
0.481819	0.462418
0.315358	0.49505
0.541583	0.183679
0.46426	0.239366
0.375498	0.198585
0.489845	0.464163
0.422223	0.362709
0.289377	0.498768
0.241226	0.465432
0.311352	0.671989
0.237156	0.402143
0.169622	0.479286
0.64027	0.176262
0.363692	0.223285
0.516371	0.18542
0.208622	0.107186
0.39848	0.0995086
0.326654	0.151266
0.131783	0.243156
0.308166	0.218235
0.466685	0.599747
0.167893	0.337905
0.179326	0.315128
0.181216	0.358324
0.201035	0.423427
0.233319	0.463364
0.141256	0.537906
0.393687	0.321279
0.196179	0.312085
0.278546	0.312085
0.249002	0.370866
0.423296	0.369341
0.413464	0.427908
	0.366671
