# Supplementary material for: LAP2alpha maintains a mobile and low assembly state of A-type lamins in the nuclear interior
Source: eLife. 2021 Feb 19;10:e63476. doi: 10.7554/eLife.63476 (PMC7939549; doi:10.7554/eLife.63476)
Supplement: Figure 4—source data 2. [file elife-63476-fig4-data2.xlsx]

## Sheet: Sheet1
Diffusion co-efficient (𝛍m2/sec) of fast and slow moving mEos3.2-lamins A and C in WT and LAP2alpha KO cells as determined by FCS
mEos3.2-lamin A/C fast fraction WT	mEos3.2-lamin A/C fast fraction KO	mEos3.2-lamin A/C slow fraction WT	mEos3.2-lamin A/C slow fraction KO
1.57218	2.11637	0.563937	0.973404	Mean
0.0738937	0.0852189	0.0593311	0.0804764	S.E.M.
0.56	1.434	0.29	0.095
0.72	3.6	0.43	0.362
0.59	1.41	0.311	1.375
1.819	2.23	1.72	0.061
0.55	1.55	0.29	1.54
1.07	2.04	0.81	0.94
0.92	2.46	0.65	1.13
1.7	1.87	1.64	0.826
1.49	2.3	1	0.392
0.891	2.36	1	2.01
0.65	0.52	0.4	2.67
1.8	2.09	1.33	1.5
0.661	1.64	0.8	0.58
1.07	1.9	1.03	1.49
1.26	3	1.24	0.86
1.184	2.33	0.44	1.9
0.92	1.23	1	0.205
1.12	1.84	1.5	0.019
1.93	2.1	0.035	1.111
1.57	1.35	0.31	1.22
1.42	1.03	0.31	2.12
1.51	2.51	1.94	0.019
1.49	2.18	0.26	0.689
2.71	2.33	1.9	0.15
1.877	1.9	0.77	0.76
1.82	2.12	0.989	2.48
2.97	1.81	1.62	2.05
1.69	2.14	0.37	1.17
2.6	2.2	1.28	0.501
0.15	1.85	0.618	2.12
1.51	3.2	1.49	0.116
3.34	2.11	0.124	1.35
2.08	3.6	0.038	0.39
2.6	2.93	1.8	0.053
1.572	3.7	2.63	0.37
2.73	2.81	0.982	0.241
2.3	2.45	0.063	0.8
1.85	3.38	0.424	0.085
1.81	2.98	0.69	0.8
1.1	2.28	0.3	0.08
2.4	2.97	0.7	0.056
0.92	2.87	0.93	0.57
2.3	2.76	0.008	0.103
2.35	1.97	0.35	0.06
1.65	2.84	0.98	0.048
1.17	3.1	0.761	0.087
2.06	3.05	0.86	0.12
3.03	2.69	0.33	0.22
1.25	3.4	0.58	0.053
2.6	4.5	0.187	0.092
0.88	2.11	0.3	0.11
1.5	1.8	0.46	0.18
1	3.67	0.262	1.6
1.46	2.04	0.05	1.08
1.18	2.89	0.07	0.032
1.65	3.3	0.64	0.2
2.2	2.98	0.125	0.119
2.65	2.99	1.11	0.057
1.05	3.12	1.96	0.37
1.68	2.2	0.026	0.137
2.69	3.1	0.108	0.46
1.64	2.93	0.363	0.3
1.99	1.592	0.105	0.27
1.54	1.418	0.08	0.169
3.09	1.447	0.036	1.592
1.29	1.345	0.029	1.418
1.76	1.481	0.3	1.447
1.42	1.42	0.133	1.345
1.72	1.41	0.142	1.481
2	1.99	0.55	1.42
1.67	1.29	1.04	1.41
2.83	1.11	0.34	1.99
1.36	1.488	0.162	1.29
1.28	5	0.33	1.11
1.62	1.305	0.91	1.488
2.22	1.31	0.129	5
1.45	1.669	1.72	1.305
4.3	1.2	0.054	1.31
1.52	1.89	0.556	1.669
1.3	1.44	0.044	1.2
3.28	1.04	0.081	1.89
1.67	1.351	0.046	1.44
1.527	1.315	0.032	1.04
1.67	1.387	0.016	1.351
0.553	1.417	0.032	1.315
0.796	1.636	0.016	1.387
0.508	1.6	0.037	1.417
0.68	1.37	0.054	1.636
0.513	1.416	0.72	1.6
0.78	1.395	0.22	1.37
0.709	2.28	0.024	1.416
0.96	1.057	0.072	1.395
0.96	1.225	0.008	2.28
0.79	1.19	0.065	1.057
0.944	0.87	0.032	1.225
0.842	1.52	0.039	1.19
3.3	1.37		0.87
1.495			1.52
1.46			1.37
1.042
2.08
1.47
0.6
0.945
0.9
0.903
