# Supplementary material for: LAP2alpha maintains a mobile and low assembly state of A-type lamins in the nuclear interior
Source: eLife. 2021 Feb 19;10:e63476. doi: 10.7554/eLife.63476 (PMC7939549; doi:10.7554/eLife.63476)
Supplement: Figure 6—source data 1. [file elife-63476-fig6-data1.xlsx]

## Sheet: Sheet1
Volume of telomere movement over 20.5 minutes (𝛍m3) in WT, Lap2alpha KO, Lmna KO and DKO cells
mEos3.2-Lmna WT	LAP2alpha KO sg1	Lmna KO	Lmna/Lap2alpha DKO
0.0219366	0.0140043	0.0650935	0.0858838	Mean
0.0153101	0.00983255	0.0469974	0.0775607	Standard deviation
0.122126	0.02639	0.0412638	0.0396289
0.046921	0.040081	0.0613579	0.015463
0.035961	0.028489	0.208347	0.0841676
0.020158	0.012663	0.0667866	0.0286614
0.025533	0.012777	0.0996247	0.103609
0.031834	0.020616	0.0338869	0.0300079
0.027481	0.011081	0.127905	0.0292514
0.015602	0.018181	0.018283	0.0668145
0.024584	0.031514	0.138398	0.143188
0.079421	0.032482	0.0700618	0.00894402
0.01341	0.01468	0.128846	0.0776025
0.019857	0.021248	0.0645348	0.0278045
0.022021	0.015072	0.11124	0.0153747
0.014086	0.01769	0.0670138	0.215247
0.022114	0.020637	0.0361595	0.0546469
0.025671	0.012473	0.0663098	0.0410599
0.013176	0.024612	0.0250892	0.0622154
0.03282	0.016035	0.0403976	0.14426
0.037654	0.023859	0.0863428	0.0643766
0.014554	0.013068	0.0481699	0.0775243
0.021784	0.029653	0.0693946	0.0520996
0.049928	0.026175	0.0311768	0.0506566
0.025198	0.012565	0.0253076	0.0523865
0.058786	0.007133	0.0417982	0.0483121
0.016323	0.018529	0.021629	0.154306
0.034545	0.015503	0.0832334	0.0568449
0.040868	0.027787	0.0418124	0.0945297
0.014875	0.016187	0.200939	0.068049
0.013947	0.017543	0.0902954	0.320194
0.03477	0.009996	0.0319028	0.033063
0.030737	0.016367	0.0559678	0.150503
0.027654	0.013542	0.0676969	0.180724
0.033616	0.012072	0.0328548	0.212746
0.023243	0.01958	0.0494178	0.0178122
0.056524	0.032114	0.0523673	0.120406
0.020841	0.021155	0.0131055	0.129027
0.008879	0.012026	0.0758259	0.31669
0.038318	0.011717	0.154848	0.0509971
0.015712	0.015776	0.0200018	0.0811786
0.068504	0.01071	0.0277978	0.251818
0.074736	0.0238	0.022385	0.0725859
0.015233	0.015605	0.0170441	0.570284
0.021803	0.014713	0.0137636	0.00988591
0.026831	0.017063	0.0435029	0.19621
0.019875	0.016992	0.0193331	0.0653533
0.033444	0.04052	0.0751238	0.0266104
0.04331	0.027155	0.0197055	0.0747174
0.053981	0.029972	0.0334797	0.0240396
0.032271	0.013592	0.151276	0.151689
0.044169	0.032101	0.0381166	0.248841
0.028103	0.043219	0.0285299	0.0210594
0.032009	0.020179	0.0659285	0.041327
0.066002	0.009107	0.0449164	0.067751
0.022641	0.006356	0.0283423	0.0184214
0.026436	0.01485	0.0518444	0.0483041
0.019736	0.007905	0.0419725	0.208408
0.016911	0.014093	0.0372505	0.0210552
0.015338	0.013278	0.0170024	0.067066
0.019164	0.019953	0.0170607	0.031909
0.023988	0.010655	0.0439307	0.0667942
0.012643	0.033076	0.147988	0.0401674
0.010453	0.010957	0.0325734	0.120625
0.019163	0.015605	0.031933	0.0217259
0.020454	0.017941	0.0182788	0.0225793
0.021058	0.016423	0.029436	0.0181294
0.011483	0.010225	0.186685	0.0913776
0.028632	0.010159	0.12573	0.0295569
0.00798	0.005511	0.0526365	0.0201059
0.012208	0.01276	0.068391	0.0284869
0.021979	0.013672	0.0934376	0.1198
0.010727	0.008775	0.0418306	0.0400549
0.010906	0.015097	0.0400017	0.0139937
0.007005	0.026258	0.109634	0.0391392
0.009232	0.011327	0.0880695	0.0313838
0.013279	0.014784	0.0722343	0.0425121
0.037894	0.007117	0.0466309	0.011055
0.011867	0.00996	0.0845899	0.0333429
0.019797	0.007849	0.121821	0.0752002
0.017311	0.009025	0.100679	0.0168291
0.029819	0.007315	0.0887292	0.0392426
0.016416	0.011567	0.108193	0.0956215
0.041382	0.01458	0.132431	0.0467325
0.022347	0.017235	0.153964	0.0388843
0.01927	0.011319	0.0808029	0.0611884
0.044236	0.022015	0.113782	0.150261
0.027131	0.030641	0.0536381	0.0688701
0.015794	0.009999	0.210908	0.0271127
0.03521	0.007036	0.138275	0.0170495
0.026452	0.013433	0.0296787	0.0281414
0.025831	0.022546	0.15833	0.0994228
0.020201	0.052539	0.119382	0.034902
0.04959	0.031444	0.19972	0.0207905
0.016461	0.018835	0.255097	0.0314731
0.032255	0.007212	0.0607162	0.0502491
0.058189	0.015165	0.195329	0.0281164
0.020123	0.024715	0.0739861	0.032142
0.023048	0.005553	0.0478688	0.0291885
0.029943	0.051701	0.141262	0.0180224
0.024055	0.018027	0.181053	0.0431656
0.011443	0.024762	0.377547	0.058839
0.018731	0.012743	0.0554268	0.033511
0.011603	0.013191	0.42527	0.0497183
0.018589	0.025853	0.400491	0.0209048
0.052006	0.014661	0.162135	0.0569773
0.027115	0.01164	0.0906194	0.0256733
0.035682	0.008283	0.0187933	0.021245
0.016488	0.008401	0.0174376	0.0750466
0.026254	0.018076	0.041846	0.00915065
0.006872	0.02699	0.0481142	0.0532415
0.005172	0.013071	0.0438184	0.041201
0.009432	0.008717	0.0503588	0.0296863
0.011403	0.010696	0.113816	0.0413475
0.006932	0.012963	0.0179157	0.0423069
0.009299	0.021666	0.0902788	0.0427459
0.023602	0.017984	0.0991778	0.0622088
0.013483	0.089954	0.0166549	0.0398414
0.013878	0.012438	0.016553	0.0411832
0.025319	0.011732	0.0306682	0.0919034
0.015095	0.007998	0.0473766	0.0543936
0.010131	0.005564	0.02273	0.0665218
0.012283	0.004367	0.0502176	0.173229
0.014317	0.008328	0.0903879	0.0730474
0.007955	0.014637	0.0450481	0.0546097
0.025745	0.009543	0.0143968	0.044588
0.013742	0.02003	0.0404552	0.100227
0.015195	0.016011	0.0574878	0.064205
0.014714	0.033468	0.0496796	0.0547824
0.021435	0.018964	0.0707596	0.0304508
0.00988	0.012404	0.0821405	0.0751524
0.006861	0.021085	0.0800764	0.0898009
0.004658	0.028293	0.0817263	0.070848
0.015425	0.014801	0.0416089	0.0619616
0.008011	0.01238	0.0517683	0.130112
0.005132	0.020274	0.0171442	0.118667
0.013312	0.015013	0.0875104	0.0759111
0.017867	0.010138	0.0749435	0.152892
0.017856	0.009264	0.0895987	0.246661
0.012639	0.011715	0.0320759	0.100702
0.022801	0.013282	0.026951	0.135754
0.004205	0.014833	0.0327441	0.0752278
0.005448	0.00823	0.0561888	0.0494451
0.0032	0.008908	0.0486182	0.0542512
0.009134	0.00779	0.0273608	0.182265
0.019952	0.017931	0.037221	0.158787
0.021644	0.017143	0.0434949	0.0596617
0.01174	0.006704	0.0581721	0.243509
0.016807	0.030397	0.205	0.0776455
0.010221	0.005776	0.0630557	0.0792227
0.021397	0.006026	0.128876	0.249641
0.018831	0.004317	0.252202	0.0376484
0.020279	0.012411	0.134524	0.0948766
0.016025	0.005779	0.03865	0.0498247
0.035386	0.011249	0.232121	0.175375
0.024193	0.014525	0.0596571	0.0455509
0.006813	0.014084	0.0369072	0.0452019
0.020064	0.023372	0.0622271	0.112346
0.021002	0.013084	0.195258	0.0775568
0.004137	0.023672	0.0405791	0.058147
0.009085	0.006751	0.0515701	0.0122427
0.021528	0.017808	0.117309	0.0673125
0.02946	0.01246	0.020274	0.0468793
0.033818	0.009626	0.0672707	0.0472185
0.031041	0.016104	0.108582	0.0412723
0.015501	0.01106	0.0211711	0.184745
0.00953	0.009324	0.0672376	0.0117092
0.016278	0.006057	0.106735	0.0256733
0.049033	0.009264	0.0335074	0.0383818
0.022413	0.012861	0.140277	0.0812101
0.018101	0.007987	0.160042	0.125269
0.026713	0.008926	0.148074	0.145483
0.02028	0.002761	0.272871	0.0162238
0.013802	0.018802	0.182287	0.0415077
0.013748	0.005305	0.0710026	0.0628336
0.019719	0.007454	0.0276566	0.0611383
0.009276	0.009245	0.0191989	0.0596588
0.016169	0.006894	0.0549399	0.0497525
0.007774	0.005764	0.0387876	0.0478656
0.007955	0.009455	0.0679897	0.107238
0.011292	0.0033	0.0313615	0.0660819
0.006899	0.002942	0.0700911	0.0417451
0.024503	0.006951	0.0357981	0.123879
0.008957	0.01433	0.0240571	0.0385131
0.0277	0.009895	0.0692248	0.0664051
0.020957	0.005705	0.0492598	0.069739
0.009187	0.004951	0.121999	0.163549
0.011932	0.008896	0.0460349	0.0795464
0.013519	0.033309	0.0522403	0.233103
0.013206	0.016978	0.0440091	0.228994
0.008981	0.013774	0.0403707	0.0480368
0.010492	0.009309	0.0615031	0.0660409
0.040123	0.020782	0.108994	0.144296
0.004541	0.010175	0.0512713	0.0899979
0.097747	0.010574	0.112077	0.0932835
0.011533	0.027794	0.130139	0.0723171
0.008043	0.015287	0.139374	0.0251076
0.009596	0.013476	0.0653234	0.117316
0.042596	0.016551	0.0388036	0.118333
0.010252	0.020839	0.0807295	0.353298
0.006121	0.013453	0.106077	0.100075
0.014522	0.007601	0.040394	0.0743454
0.039386	0.004432	0.0246802	0.500277
0.020601	0.011046	0.0356462	0.0276172
0.007553	0.014242	0.0607625	0.0687007
0.023632	0.013595	0.0730719	0.176086
0.02366	0.010621	0.10981	0.0435794
0.012079	0.009797	0.0455614	0.0600144
0.028278	0.016615	0.0316082	0.0955027
0.025643	0.005304	0.0345901	0.181369
0.024966	0.012307	0.0570132	0.0868818
0.023785	0.024337	0.034807	0.101137
0.020069	0.003487	0.0482481	0.267027
0.02244	0.004607	0.054026	0.0511452
0.027821	0.011648	0.0391191	0.142672
0.049975	0.007735	0.0276165	0.140232
0.017919	0.007411	0.0248756	0.164165
0.01705	0.013795	0.0390402	0.243049
0.021406	0.004852	0.063569	0.306805
0.014458	0.022157	0.0719345	0.0636849
0.012852	0.012803	0.0970411	0.263746
0.01605	0.009942	0.032804	0.0804186
0.023561	0.009964	0.0429601	0.0648623
0.030809	0.010851	0.0472551	0.0802225
0.016587	0.010442	0.0409161	0.37785
0.010467	0.042898	0.0538046	0.154354
0.007731	0.020537	0.0571498	0.237415
0.007788	0.003705	0.0411236	0.174325
0.009054	0.006318	0.0261765	0.452471
0.006915	0.006942	0.0156421	0.265784
0.003147	0.008479	0.0159018	0.102101
0.014745	0.008524	0.0207427	0.101138
0.015983	0.023213	0.0198955	0.124829
0.012548	0.005226	0.0364804	0.0966632
0.012775	0.007578	0.058273	0.114118
0.011551	0.015468	0.0976689	0.110397
0.019705	0.009007	0.0216293	0.0780997
0.01942	0.003362	0.0164168	0.0407277
0.007623	0.013669	0.0371415	0.325296
0.026294	0.006097	0.0971126	0.0806834
0.006534	0.020503	0.0342673	0.0526597
0.014068	0.011389	0.0322245	0.107298
0.016075	0.017101	0.0159722	0.103428
0.017719	0.007031	0.0728842	0.0356087
0.009516	0.006512	0.110721	0.0465257
0.007242	0.011728	0.0531728	0.0388098
0.013056	0.006019	0.0314223	0.0514302
0.015757	0.011538	0.0536008	0.0890263
0.00764	0.014392	0.0605361	0.104968
0.016203	0.009339	0.0794987	0.0714681
0.030043	0.022777	0.033809	0.105086
0.009729	0.009453	0.0880159	0.156839
0.011248	0.021841	0.0203473	0.1806
0.006249	0.012474	0.0292002	0.098309
0.010761	0.005696	0.0259336	0.184002
0.025733	0.007273	0.0132798	0.0639437
0.012327	0.008573	0.0680403	0.0374936
0.008774	0.006752	0.0511146	0.0776148
0.007049	0.023991	0.0522156	0.15295
0.0076	0.015663	0.0225431	0.190494
0.007739	0.01324	0.0217165	0.0242481
0.007297	0.012252	0.029854	0.029055
0.012474	0.010386	0.0176006	0.0463494
0.013667	0.009189	0.020929	0.0702886
0.007685	0.008541	0.0425311	0.0663216
0.007443	0.0117	0.045739	0.121416
0.007711	0.00804	0.0302455	0.0718121
0.017693	0.009189	0.0578745	0.0999873
0.031739	0.010845	0.0209608	0.0873411
0.033485	0.019002	0.023142	0.101162
0.00831	0.023297	0.0271331	0.0484222
0.013079	0.007834	0.0212173	0.0436515
0.062943	0.008376	0.0198221	0.0561514
0.023735	0.012955	0.0319521	0.229178
0.033853	0.007045	0.0430765	0.108673
0.033307	0.006356	0.00990792	0.0291609
0.035231	0.010231	0.0268839	0.0885762
0.029193	0.006142	0.0468305	0.021117
0.029716	0.004374	0.0658999	0.0203518
0.057389	0.007009	0.0692771	0.0309453
0.013892	0.009633	0.0572628	0.0842891
0.027557	0.003924	0.111812	0.0509118
0.015302	0.008118	0.00919237	0.0522681
0.007599	0.015633	0.020382	0.0260175
0.018686	0.020083	0.0234998	0.0954783
0.031705	0.020759	0.0579853	0.147181
0.00786	0.002878	0.0272074	0.0569448
0.014532	0.009355	0.0443116	0.0778521
0.011581	0.008363	0.0298609	0.0132447
0.018371	0.005275	0.0968229	0.050516
0.009922	0.004253	0.0178556	0.105288
0.0059	0.002784	0.0117063	0.0632933
0.019268	0.005077	0.0531046	0.103542
0.017174	0.00698	0.0721467	0.176789
0.040857	0.00979	0.018124	0.0295112
0.01707	0.005387	0.0209653	0.0288667
0.021184	0.005039	0.0714333	0.0548668
0.01779	0.006947	0.0739951	0.16739
0.025897	0.003181	0.00846429	0.0943451
0.032429	0.003841	0.0629335	0.017727
0.00908	0.01176	0.0546427	0.034147
0.017354	0.003096	0.0824169	0.0509226
0.014605	0.003164	0.104338	0.019323
0.015353	0.007554	0.0315967	0.0573183
0.022785	0.011734	0.0556812	0.0537975
0.015363	0.012956	0.0360869	0.0489135
0.021546	0.007187	0.049555	0.0167179
0.014612	0.016412	0.0280029	0.0230954
0.030645	0.00934	0.0520157	0.0419136
0.040924	0.033072	0.0166802	0.0501924
0.020645	0.005537	0.0328551	0.0241795
0.025249	0.013294	0.122395	0.11824
0.018436	0.036183	0.0847728	0.0456817
0.041444	0.005459	0.0176719	0.0194208
0.015538	0.003472	0.0220853	0.0371533
0.005734	0.00679	0.0708546	0.0448916
0.013823	0.015068	0.0121476	0.0901778
0.01577	0.01532	0.0483678	0.0435519
0.016084	0.014954	0.0294979	0.0255721
0.046734	0.01681	0.0579366	0.0338491
0.036312	0.011339	0.0496863	0.0320684
0.027587	0.010482	0.063657	0.020322
0.054618	0.007408	0.0143516	0.0427905
0.013806	0.008923	0.0300799	0.144378
0.022763	0.004589	0.072111	0.0410015
0.012423	0.005564	0.0357592	0.127609
0.048656	0.01035	0.0511349	0.0456946
0.017873	0.005136	0.030741	0.019178
0.020466	0.007321	0.0656098	0.016286
0.018342	0.006309	0.0600263	0.0417502
0.012602	0.01422	0.057291	0.02387
0.044712	0.010098	0.0308148	0.0490626
0.03537	0.00979	0.113358	0.0271718
0.035893	0.002565	0.0562119	0.0169578
0.040747	0.007307	0.0577581	0.0402156
0.036868	0.007495	0.0666054	0.0790889
0.022707	0.014483	0.0441763	0.0462571
0.016416	0.014391	0.0310186	0.030741
0.021399	0.006294	0.0206992	0.110899
0.026884	0.006173	0.106321	0.120681
0.039592	0.021051	0.164475	0.177977
0.038518	0.015777	0.0494928	0.250286
0.017593	0.004424	0.172108	0.132433
0.012272	0.017015	0.0724497	0.0694476
0.023072	0.00435	0.0366406	0.0694484
0.032244	0.009937	0.0596736	0.109404
0.013698	0.005167	0.0244687	0.104465
0.020562	0.006199	0.0308147	0.337154
0.025562	0.020762	0.0254148	0.0322463
0.045904	0.013322	0.0555726	0.137461
0.037461	0.0128	0.0923914	0.0369393
0.028652	0.007529	0.0578694	0.0779709
0.017715	0.009842	0.159794	0.0417686
0.024198	0.004145	0.0824136	0.0454958
0.033479	0.007268	0.0932481	0.0401286
0.025929	0.006052	0.126293	0.107527
0.027133	0.009273	0.0837136	0.197408
0.019574	0.015923	0.111808	0.0595967
0.040972	0.00787	0.102701	0.0881065
0.035424	0.003504	0.022658	0.0359687
0.018279	0.009498	0.0398901	0.100278
0.100309	0.004887	0.0573294	0.065266
0.031623	0.023353	0.0966437	0.0800614
0.025097	0.020189	0.056715	0.110984
0.016885	0.003196	0.0512336	0.0303137
0.016303	0.010587	0.0661652	0.104089
0.022326	0.00787	0.0454794	0.0604886
0.018909	0.01632	0.0557088	0.143421
0.035453	0.009306	0.0268039	0.0335726
0.018804	0.011181	0.0570048	0.0300906
0.020035	0.043719	0.0614778	0.0319381
0.032243	0.041063	0.0821161	0.0372365
0.011826	0.021415	0.145905	0.0354012
0.021876	0.025254	0.0780941	0.118858
0.025808	0.008528	0.0487904	0.0156859
0.026142	0.023027	0.0326216	0.021324
0.024129	0.021448	0.125183	0.0490455
0.018843	0.018343	0.112432	0.139762
0.014545	0.035284	0.0602975	0.0520822
0.098087	0.027947	0.116139	0.0979534
0.036328	0.04597	0.0165179	0.0366765
0.037677	0.033529	0.0335262	0.0864212
0.03825	0.036689	0.0390842	0.176983
0.042291	0.033403	0.0465886	0.126221
0.016576	0.019156	0.018261	0.132733
0.010397	0.01753	0.0360775	0.0652144
0.010572	0.022454	0.0249147	0.0290948
0.011559	0.020573	0.113253	0.0182883
0.036471	0.027874	0.0413129	0.0862973
0.015141	0.018039	0.0689431	0.0805174
0.027317	0.019247	0.0992399	0.0532613
0.043596	0.044298	0.023723	0.13527
0.024874	0.013227	0.0432801	0.165209
0.046273	0.028325	0.132745	0.0764207
0.019781	0.029943	0.0352684	0.0886498
0.020232	0.014411	0.0101659	0.0669963
0.016148	0.030064	0.202751	0.0525643
0.052528	0.024137	0.0199908	0.0439561
0.02007	0.03259	0.0429718	0.0518847
0.031999	0.053481	0.0478052	0.117363
0.008698	0.020675	0.0160711	0.0586573
0.053205	0.0472	0.0513029	0.0877026
0.012178	0.017443	0.043166	0.0698127
0.026467	0.009965	0.0368418	0.038605
0.020308	0.00984	0.17479	0.0584332
0.022124	0.01699	0.0731093	0.0283519
0.015414	0.009935	0.0762971	0.064988
0.023221	0.008711	0.0387434	0.117077
0.020078	0.01162	0.100668	0.0865318
0.016061	0.044529	0.0547666	0.0159304
0.094584	0.010426	0.039762	0.0358091
0.009881	0.00588	0.0921245	0.0400601
0.013031	0.005886	0.0316827	0.0562479
0.036479	0.005744	0.079117	0.0156893
0.060772	0.044806	0.0428	0.0396772
0.025597	0.012853	0.140822	0.0354034
0.020723	0.016386	0.062176	0.151265
0.040066	0.020118	0.0612918	0.0596506
0.026352	0.008358	0.0332232	0.0525277
0.028465	0.007468	0.0628566	0.0724637
0.041204	0.019379	0.0622746	0.0329495
0.015022	0.008347	0.123658	0.0310521
0.031795	0.008904	0.073525	0.0301175
0.018932	0.008809	0.131046	0.0321712
0.028239	0.010138	0.0957696	0.302574
0.027615	0.005178	0.0390687	0.0901203
0.017649	0.00447	0.0515534	0.0442044
0.007705	0.006334	0.0322865	0.0809971
0.013348	0.010665	0.0664178	0.0873681
0.05047	0.012872	0.0996108	0.0591744
0.011858	0.005373	0.0797922	0.0822059
0.00642	0.010578	0.122336	0.184538
0.015553	0.005957	0.162517	0.0825013
0.046193	0.010943	0.0343882	0.223899
0.022004	0.003511	0.0728924	0.0359399
0.012033	0.012792	0.0201539	0.064071
0.008474	0.005461	0.0883331	0.0264356
0.014342	0.00572	0.0430938	0.046202
0.007618	0.021451	0.0245001	0.0304717
0.007154	0.013368	0.0783844	0.0350246
0.006191	0.008218	0.101735	0.0507119
0.006771	0.013035	0.0768414	0.015378
0.0058	0.009768	0.0694059	0.0259285
0.011221	0.017982	0.0635627	0.0823866
0.014877	0.011362	0.147686	0.0367764
0.034572	0.008941	0.0389468	0.0373293
0.011756	0.007348	0.0299596	0.012867
0.009557	0.005977	0.057596	0.0170233
0.01166	0.007401	0.0951424	0.0178733
0.010306	0.004941	0.0210489	0.032513
0.004416	0.004589	0.11898	0.063239
0.02152	0.052655	0.0563267	0.0104096
0.005209	0.004746	0.100899	0.0441714
0.006522	0.002495	0.101942	0.0151969
0.01827	0.011386	0.078061	0.0377556
0.005329	0.007616	0.0854407	0.0186847
0.009726	0.011689	0.0610809	0.023794
0.005814	0.004931	0.0493399	0.0210435
0.002735	0.011022	0.0958754	0.0632601
0.018194	0.042652	0.130767	0.0407523
0.008376	0.004803	0.105399	0.0508107
0.005496	0.006024	0.102554	0.0963901
0.007255	0.007894	0.117774	0.152779
0.00564	0.005217	0.0806715	0.0757357
0.006986	0.012174	0.0166741	0.0517934
0.01035	0.004002	0.113763	0.0362732
0.00308	0.004522	0.074245	0.0720409
0.003878	0.005718	0.0325459	0.0199446
0.003508	0.006784	0.0503415	0.0735259
0.029899	0.004989	0.0516681	0.0687514
0.007916	0.006959	0.0584615	0.0792584
0.006385	0.008297	0.0533689	0.0299245
0.003755	0.008712	0.0482352	0.113636
	0.022033	0.0711836	0.0497986
	0.00902	0.0565406	0.130696
	0.00632	0.0658559	0.040771
	0.006001	0.0758596	0.0510407
	0.010812	0.0172621	0.0659873
	0.004258	0.115355	0.0624839
	0.009665	0.0426172	0.0471946
	0.005874	0.0232929	0.0492683
	0.050009	0.122657	0.0340838
	0.014616	0.100123	0.0321154
	0.005947	0.0559763	0.0354347
	0.007119	0.0257892	0.015224
	0.022405	0.0617009	0.0746619
	0.005219	0.0700082	0.00981449
	0.010177	0.0678778	0.0219688
	0.012939	0.0237427	0.0616706
	0.002256	0.069641	0.0180194
	0.012544	0.037843	0.0542107
	0.008195	0.0284339	0.0119914
	0.010752	0.0110292	0.0736661
	0.032198	0.017701	0.0874665
	0.012679	0.0331258	0.0478348
	0.022392	0.115698	0.0942207
	0.005035	0.11512	0.0846305
	0.005316	0.0441807	0.12431
	0.007554	0.0182295	0.132963
	0.012094	0.0246203	0.065726
	0.028995	0.0516992	0.0465939
	0.004388	0.0607004	0.0445399
	0.009267	0.0979252	0.0434445
	0.012844	0.0899658	0.0420828
	0.00706	0.0937249	0.0653486
	0.008465	0.136289	0.180908
	0.004713	0.0624063	0.288432
	0.008623	0.199623	0.0704874
	0.01146	0.101583	0.13616
	0.007847	0.144744	0.0654663
	0.013517	0.0467231	0.148537
	0.021434	0.0520616	0.282137
	0.017824	0.208496	0.0812662
	0.014064	0.124494	0.046388
	0.009252	0.0827005	0.0552772
	0.012656	0.11081	0.0358008
	0.012979	0.116992	0.0931183
	0.008339	0.136239	0.13586
	0.012776	0.127871	0.0296727
	0.00793	0.135994	0.138399
	0.006214	0.0298803	0.0389752
	0.016643	0.0515296	0.104875
	0.011462	0.0443113	0.0392138
	0.024845	0.0546246	0.0655505
	0.023121	0.0683201	0.0738836
	0.010494	0.0571093	0.0392025
	0.024675	0.0671486	0.0348874
	0.021232	0.0737197	0.045806
	0.021833	0.0479474	0.248437
	0.011798	0.0534744	0.0448842
	0.020413	0.244405	0.114078
	0.008875	0.0301197	0.0292652
	0.017569	0.0162986	0.0549114
	0.040082	0.160127	0.0993194
	0.007489	0.0399758	0.0661421
	0.009916	0.0947674	0.11682
	0.009699	0.100415	0.065998
	0.007412	0.112376	0.142334
	0.010376	0.0514425	0.116326
	0.003395	0.0722777	0.0799495
	0.005793	0.0861863	0.0843422
	0.009693	0.133809	0.0717055
	0.006228	0.0725759	0.106988
	0.011944	0.0881766	0.291432
	0.0072	0.0582618	0.0762123
	0.006389	0.0331326	0.108265
	0.004585	0.137457	0.089772
	0.008235	0.0216283	0.0850972
	0.023697	0.062295	0.192114
	0.052951	0.0663838	0.124146
	0.015142	0.0933775	0.12799
	0.014737	0.0596475	0.0457852
	0.014815	0.0799064	0.161458
	0.013776	0.0788234	0.176161
	0.017604	0.147797	0.273139
	0.016263	0.0245209	0.113205
	0.024611	0.0528298	0.114888
	0.010864	0.0388893	0.179025
	0.008945	0.0315464	0.17032
	0.004008	0.0632683	0.113637
	0.015455	0.11689	0.0976007
	0.009579	0.0798678	0.136178
	0.012294	0.0547875	0.173218
	0.006247	0.136976	0.0799174
		0.0394577	0.0492493
		0.0477384	0.0737757
		0.0463238	0.100691
		0.0631606	0.0973539
		0.0377216	0.0384014
		0.0298941	0.161074
		0.0859887	0.0933199
		0.165409	0.0663469
		0.0611481	0.0578495
		0.0561514	0.160375
		0.0493477	0.206602
		0.0317784	0.0663349
		0.09402	0.221902
		0.120691	0.137771
		0.134094	0.0896816
		0.0371656	0.237327
		0.111252	0.237426
		0.143115	0.219285
		0.152097	0.0562165
		0.0840496	0.154132
		0.0573594	0.0534081
		0.103104	0.0514269
		0.176195	0.0583891
		0.124352	0.0947961
		0.111769	0.424137
		0.0521456	0.211789
		0.0778948	0.0928683
		0.0557745	0.0878853
		0.0327129	0.169481
		0.0268954	0.30135
		0.194194	0.119907
		0.171539	0.246869
		0.115142	0.0890559
		0.11169	0.0746883
		0.138054	0.0613135
		0.099806	0.0929709
		0.0466559	0.130022
		0.0708137	0.085119
		0.077808	0.0668454
		0.0529595	0.134398
		0.0381879	0.0479928
		0.144197	0.0576926
		0.125018	0.0834845
		0.113206	0.0458156
		0.0783661	0.0662437
		0.150117	0.0718891
		0.0850664	0.0891125
		0.0830153	0.175108
		0.188104	0.116477
		0.12246	0.0550286
		0.0422206	0.05641
		0.109377	0.124773
		0.11931	0.0761112
		0.184646	0.0375853
		0.142811	0.0547371
		0.0563944	0.101338
		0.061585	0.0466078
		0.0240321	0.0583392
		0.0462354	0.0593637
		0.0280612	0.309243
		0.0234013	0.0246198
		0.053935	0.0454268
		0.0591439	0.0288144
		0.0313407	0.0649484
		0.0134663	0.307139
		0.0180706	0.0804803
		0.0168824	0.13663
		0.052804	0.0317573
		0.0262911	0.0474828
		0.040977	0.0306154
		0.0214426	0.0401373
		0.0404086	0.107843
		0.0230165	0.151688
		0.0389968	0.20894
		0.0176693	0.0964773
		0.0139612	0.03945
		0.0524732	0.162898
		0.110329	0.084584
		0.0235509	0.0767612
		0.0693339	0.0779452
		0.0853962	0.0663306
		0.0431379	0.0996994
		0.0701295	0.125334
		0.108985	0.0702959
		0.0664461	0.146919
		0.101245	0.0737549
		0.102705	0.118818
		0.0669572	0.118292
		0.0498007	0.0665954
		0.047869	0.133069
		0.042816	0.0484375
		0.102162	0.0922475
		0.0543872	0.0206269
		0.0765465	0.0663149
		0.0616104	0.0664764
		0.0353607	0.019127
		0.0875246	0.0663
		0.131033	0.0821275
		0.0329955	0.0158843
		0.0448902	0.0829312
		0.0423687	0.0220598
		0.0586318	0.0565729
		0.0422776	0.062776
		0.0916276	0.0162552
		0.0345669	0.0208027
		0.0388778	0.034704
		0.0446479	0.0286879
		0.202671	0.0444449
		0.0532099	0.0176405
		0.0651988	0.0381866
		0.0722073	0.0345337
		0.0691125	0.0281967
		0.139367	0.0288169
		0.0433849	0.0417355
		0.0415986	0.0182275
		0.103572	0.0924537
		0.0501969	0.028555
		0.0499976	0.0313055
		0.0352787	0.0197324
		0.0603207	0.0579699
		0.17659	0.073224
		0.0481523	0.011974
		0.0543672	0.0145142
		0.0927764	0.019841
		0.048937	0.100983
		0.0880971	0.0525193
		0.12634	0.0528887
		0.134308	0.0450525
		0.0679884	0.053254
		0.0818043	0.0344724
		0.0953022	0.0365464
		0.0111169	0.0176205
		0.0891505	0.0675736
		0.0172236	0.0221668
		0.0240384	0.0109728
		0.0184981	0.0157396
		0.0317529	0.0131597
		0.101706	0.0289582
		0.0299571	0.0707919
		0.0311384	0.115037
		0.0515731	0.0452948
		0.0165945	0.0645163
		0.00731792	0.191764
		0.0218698	0.118333
		0.0273322	0.0759601
		0.0271306	0.0444992
		0.0446711	0.127136
		0.0193161	0.0662194
		0.0127968	0.0735272
		0.0373277	0.0296418
		0.0402475	0.029283
		0.021036	0.0843202
		0.0171637	0.134898
		0.011514	0.0660876
		0.022659	0.0612747
		0.0236494	0.0713344
		0.0834811	0.0387162
		0.0195905	0.0323741
		0.0310282	0.0680591
		0.0169082	0.167433
		0.0645651	0.0507012
		0.0462889	0.0937777
		0.0161707	0.0640425
		0.0128254	0.120551
		0.0341975	0.0623639
		0.0441242	0.15851
		0.049106	0.0472113
		0.0495968	0.138422
		0.0879686	0.201341
		0.0201999	0.142857
		0.120168	0.116283
		0.0322821	0.21591
		0.0523535	0.0324658
		0.146773	0.234849
		0.078363	0.0574249
		0.0495784	0.322626
		0.0445635	0.130626
		0.0774458	0.105102
		0.0569736	0.0593176
		0.0627545	0.16629
		0.0547998	0.299145
		0.0462188	0.0654837
		0.124571	0.0910367
		0.0883812	0.0961995
		0.0478599	0.0876175
		0.0388966	0.0829379
		0.106339	0.0653393
		0.0806404	0.0479764
		0.0395359	0.150891
		0.0715784	0.0831849
		0.0286402	0.133019
		0.0241277	0.113558
		0.0269791	0.0811181
		0.0415706	0.108497
		0.0887087	0.0661433
		0.0333497	0.0290525
		0.169145	0.0852516
		0.0748545	0.098534
		0.0483447	0.112405
		0.0343622	0.0558013
		0.0447452	0.0732707
		0.0230384	0.0672696
		0.0558	0.0796174
		0.0471755	0.115957
		0.0452234	0.0653559
		0.0840351	0.0591657
		0.0239881	0.0485508
		0.0507904	0.0987761
		0.0371917	0.0299828
		0.0873375	0.0473074
		0.056607	0.071105
		0.0579573	0.0786469
		0.0812837	0.0816369
		0.0727052	0.0324517
		0.0689733	0.0921989
		0.0521179	0.0638648
		0.0697629	0.0696467
		0.0978588	0.0858458
		0.0114331	0.0907946
		0.0111595	0.0448403
		0.0259129	0.0611639
		0.0166394	0.0548464
		0.0202582	0.029941
		0.0450484	0.0237009
		0.0087725	0.0555665
		0.0302645	0.0565017
		0.0364943	0.086584
		0.0397724	0.0627903
		0.0380608	0.0525935
		0.0138984	0.0677907
		0.101003	0.0310531
		0.0446953	0.047581
		0.0446067	0.0702166
		0.0294181	0.0807796
		0.0214217	0.08778
		0.0266764	0.044287
		0.0737646	0.117058
		0.0419468	0.125282
		0.0283982	0.0607994
		0.034633	0.0481948
		0.0302411	0.0420879
		0.0132917	0.0419293
		0.020043	0.0509853
		0.0495675	0.061966
		0.025005	0.0383884
		0.0188475	0.0612138
		0.0196288	0.0845995
		0.08395	0.0664359
		0.0295909	0.124344
		0.0206841	0.042757
		0.0314416	0.132038
		0.0252211	0.113133
		0.0246703	0.0860684
		0.0239903	0.0540202
		0.0537703	0.165512
		0.0810553	0.122194
		0.0285076	0.317689
		0.0352189	0.194034
		0.0137725	0.216472
		0.00695891	0.123068
		0.0374406	0.22763
		0.0103159	0.211605
		0.0101659	0.119253
		0.0454471	0.0597566
		0.068941	0.0291102
		0.0397383	0.102638
		0.0255386	0.0601321
		0.0249068	0.0801446
		0.0224281	0.0469202
		0.0501979	0.0522241
		0.0806508	0.166353
		0.0586743	0.0557772
		0.0458357	0.0759132
		0.0580027	0.0260497
		0.0960089	0.0144577
		0.110275	0.0239232
		0.055771	0.0721251
		0.0351502	0.0298308
		0.0609956	0.0128855
		0.0536884	0.0706163
		0.0899119	0.117146
		0.0830649	0.0387716
		0.0740282	0.041129
		0.0392161	0.0208813
		0.101449	0.0269984
		0.0696222	0.0113726
		0.0563018	0.0830966
		0.0742394	0.130858
		0.0723533	0.336839
		0.140617	0.278697
		0.0899356	0.534842
		0.00844574	0.289463
		0.0624701	0.401797
		0.0219965	0.274147
		0.0285825	0.131778
		0.0274573	0.208769
		0.0520426	0.153665
		0.0402597	0.128254
		0.035811	0.0588381
		0.108529	0.247859
		0.0250494	0.16154
		0.0228446	0.0719188
		0.0522516	0.286979
		0.0582872	0.4069
		0.0387155	0.101132
		0.0199701	0.16865
		0.0706261	0.24554
		0.0888405	0.0714079
		0.0500119	0.164081
		0.018344	0.108088
		0.0317028	0.10618
		0.0384215	0.0796612
		0.0419308	0.116545
		0.0674053	0.0182665
		0.073107	0.0612689
		0.0295776	0.383898
		0.0642003	0.0808758
		0.151004	0.0455356
		0.032416	0.0949638
		0.0512782	0.122804
		0.0120233	0.090834
		0.0436415	0.170709
		0.0144656	0.11423
		0.043964	0.114768
		0.0605713	0.124519
		0.129665	0.144755
		0.0483524	0.0975095
		0.16978	0.220161
		0.0999257	0.0791625
		0.115605	0.054228
		0.108501	0.013723
		0.0433375	0.0476058
		0.0432488	0.0353544
		0.0514919	0.0561349
		0.0360049	0.0121603
		0.0807412	0.0223302
		0.0747203	0.0249993
		0.0375651	0.0126041
		0.0199502	0.0423234
		0.0160821	0.0201101
		0.0756039	0.0283684
		0.0204999	0.00577996
		0.118311	0.0088791
		0.103934	0.0138354
		0.0192751	0.0335929
		0.0297962	0.0427889
		0.0147768	0.0158295
		0.0510877	0.0510745
		0.0612972	0.0252855
		0.120598	0.0117715
		0.0871016	0.0244916
		0.0293071	0.0123271
		0.0428949	0.0136684
		0.0285622	0.107282
		0.0591373	0.028125
		0.122868	0.0086654
		0.0235625	0.0182489
		0.0730713	0.0362774
		0.136833	0.0253974
		0.0435382	0.0277698
		0.011226	0.0199988
		0.0137329	0.00904033
		0.0390959	0.0579629
			0.0311143
			0.0427961
			0.0390111
			0.143587
			0.0760609
			0.0707704
			0.0623558
			0.0523963
			0.0634322
			0.0932226
			0.114622
			0.297252
			0.170159
			0.0551352
			0.0940905
			0.076649
			0.0890621
			0.15424
			0.10461
			0.13783
			0.258524
			0.120395
			0.0536955
			0.0557139
			0.0552638
			0.0386519
			0.048129
			0.184693
			0.0604793
			0.0614594
			0.0709102
			0.146624
			0.0335713
			0.0413487
			0.0820713
			0.120347
			0.308579
			0.035275
			0.128672
			0.22394
			0.0748691
			0.0921573
			0.093757
			0.0965729
			0.0833491
			0.130577
			0.160395
			0.0736691
			0.0803183
			0.0799051
			0.0470389
			0.034675
			0.156389
			0.0920017
			0.136935
			0.115124
			0.0707827
			0.0565767
			0.0651186
			0.0577544
			0.153014
			0.0622737
			0.0779759
			0.122433
			0.121168
			0.0585827
			0.0417529
			0.0890409
			0.124582
			0.116494
			0.0895585
			0.0711897
			0.0258196
			0.140088
			0.0239842
			0.0278625
			0.131962
			0.114744
			0.0896468
			0.141172
			0.0881884
			0.0903909
			0.09808
			0.126924
			0.0432267
			0.136454
			0.0996784
			0.0699978
			0.182098
			0.329627
			0.0467149
			0.10233
			0.10608
			0.0708
			0.0644261
			0.105328
			0.137994
			0.285319
			0.138976
			0.0428387
			0.0914196
			0.188671
			0.124387
			0.0590424
			0.0539884
			0.149387
			0.0856221
			0.177417
			0.0501314
			0.0389361
			0.0552681
			0.174296
			0.0763776
			0.115651
			0.0247529
			0.0245643
			0.0293666
			0.0732883
			0.0534171
			0.0201101
			0.0414056
			0.0990414
			0.037059
			0.102399
			0.0505677
			0.0255748
			0.0533443
			0.0962816
			0.0207079
			0.0394004
			0.0344728
			0.0168714
			0.0252011
			0.0792126
			0.00975979
			0.0669881
			0.0249489
			0.0307247
			0.0781091
			0.0366955
			0.0718212
			0.0884009
			0.0194979
			0.0113271
			0.0289299
			0.0242339
			0.0276794
			0.0156422
			0.0378149
			0.0229385
			0.0487713
			0.0340301
			0.0539134
			0.0160442
			0.0751515
			0.0391428
			0.0155009
			0.0282628
			0.0603097
			0.0750605
			0.0155238
			0.215557
			0.419588
			0.115701
			0.260111
			0.41281
			0.418006
			0.896357
			0.132012
			0.132682
			0.23164
			0.108747
			0.247153
			0.553249
			0.50488
			0.213495
			0.0444967
			0.0276201
			0.0303533
			0.0119136
			0.0270143
			0.0462815
			0.014557
			0.0129182
			0.0237865
			0.0262257
			0.0426211
			0.0422108
			0.0290628
			0.040742
			0.111332
			0.122792
			0.0555635
			0.0305523
			0.103799
			0.0942696
			0.0988391
			0.0613086
			0.0957177
			0.045591
			0.0676635
			0.0797036
			0.2073
			0.0911503
			0.0746151
			0.107735
			0.0787167
			0.109544
			0.0368823
			0.0820432
			0.0837031
			0.208583
			0.0311652
			0.100207
			0.0939319
			0.0388065
			0.0534908
			0.194216
			0.0888488
			0.486589
			0.127368
			0.170885
			0.19453
			0.114773
			0.12537
			0.117433
			0.0576415
			0.346285
			0.163866
			0.146344
			0.0998279
			0.030275
			0.0995111
			0.0903085
			0.0838852
			0.115638
			0.368795
			0.338575
			0.100294
			0.121585
			0.146501
			0.124745
			0.202564
			0.0938357
			0.134086
			0.130603
			0.15546
			0.0670226
			0.0575231
			0.0388743
			0.0184981
			0.0372163
			0.0183158
			0.0163176
			0.0183956
			0.00645279
			0.0354455
			0.0474561
			0.0252793
			0.0311053
			0.0594042
			0.0256587
			0.0786862
			0.0150653
			0.0873486
			0.0433495
			0.0237558
			0.0323437
			0.0215995
			0.0495627
			0.0402301
			0.0333367
			0.128308
			0.0776784
			0.0840293
			0.03219
			0.0234502
			0.019607
			0.0451971
			0.0100226
			0.0406124
			0.0318544
			0.0262303
			0.078462
			0.0325081
			0.0134128
			0.0853242
			0.0255941
			0.0161994
			0.132707
			0.0662873
			0.0452899
			0.0152454
			0.0754596
			0.072737
			0.0406371
			0.112924
			0.152995
			0.0289093
			0.0282945
			0.0112132
			0.0221058
			0.0132924
			0.021667
			0.0203021
			0.0124123
			0.0359761
			0.0456154
			0.0548624
			0.0779513
			0.029028
			0.154238
			0.0144361
			0.0291298
			0.0464537
			0.0308283
			0.0574346
			0.0564844
			0.0820112
			0.0383932
			0.0533457
			0.035067
			0.107255
			0.0149472
			0.0933261
			0.011939
			0.126121
			0.0621861
			0.0173729
			0.0229762
			0.114938
			0.0561488
			0.0412596
			0.0178819
			0.0564225
			0.149381
			0.0205133
			0.0477138
			0.109739
			0.0171829
			0.0233131
			0.119321
			0.0333935
			0.0227614
			0.0533512
			0.0581389
			0.118492
			0.0506829
			0.0354044
			0.0501201
			0.0496202
			0.0410937
			0.0455189
			0.0355848
			0.0184254
			0.0192156
			0.0150965
			0.0384858
			0.00756317
			0.0450534
			0.0481292
			0.0299055
			0.0504621
			0.0160841
			0.0122852
			0.053166
			0.014217
			0.0453433
			0.0261755
			0.0474312
			0.0740508
			0.0112835
			0.0337903
